# Supplementary material
Source: PubMed Central journal article supplement (PMC4808397)
Supplement: NIHMS748828-supplement-2.pdf [file NIHMS748828-supplement-2.pdf]

SUPPLEMENTARY MATERIALS: FIGURES

**Elevated microsatellite alterations with allelic loss on 9p24.2 signify less aggressive metastasis in colorectal cancer**

Minoru Koi,<sup>1,2</sup> Melissa Garcia,<sup>2</sup> Chan Choi,<sup>3</sup> Hyeong-Rok Kim,<sup>4</sup> Junichi Koike,<sup>5</sup> Hiromichi Hemmi,<sup>6</sup> Takeshi Nagasaka,<sup>7</sup> Yoshinaga Okugawa,<sup>2,8</sup> Yuji Toiyama,<sup>8</sup> Takahito Kitajima,<sup>8</sup> Hiroki Imaoka,<sup>8</sup> Masato Kusunoki,<sup>8</sup> Yin-Hsiu Chen,<sup>9</sup> Bhramar Mukherjee,<sup>9</sup> C Richard Boland,<sup>2</sup> John M Carethers<sup>1</sup>

**SUPPLEMENTARY FIGURES AND FIGURE LEGENDS**

FIGURE 1A.

| E/L<br>24 LMs | EMAST Markers   |            | NCI Markers |     | Genotype | FS/LOH Status of 15 loci in LM from Primary CRC |       |        |        |     |      |       |     |       |      |        |      |       |       |         | Mutation at |      |
|---------------|-----------------|------------|-------------|-----|----------|-------------------------------------------------|-------|--------|--------|-----|------|-------|-----|-------|------|--------|------|-------|-------|---------|-------------|------|
|               | FS at           | FS at      |             |     |          | RBM47                                           | WIPF2 | ANKRD5 | ZNF161 | S11 | S303 | KDM6B | MNT | S1179 | BCL2 | SEMA6D | S818 | STYK1 | BCL6B | SMARCA2 | KRAS        | BRAF |
| K-L1          | MYCL1, L17835   | S250, S69  | E/L         | FS  | ROH      | H                                               | H     | LOH    | ROH    | H   | ROH  | H     | LOH | LOH   | ROH  | H      | H    | H     | H     | H       | N           | N    |
| K-L5          | S82, S242, S321 |            | E/L         | ROH | H        | LOH                                             | H     | ROH    | LOH    | H   | LOH  | H     | LOH | H     | LOH  | H      | H    | ROH   | H     | H       | N           | N    |
| K-L6          | S242            |            | E/L         | LOH | ROH      | LOH                                             | H     | FS     | LOH    | H   | LOH  | ROH   | LOH | LOH   | H    | ROH    | ROH  | ROH   | ROH   | N       | N           |      |
| K-L7          | S321            |            | E/L         | H   | H        | ROH                                             | H     | LOH    | LOH    | H   | LOH  | H     | LOH | ROH   | LOH  | LOH    | H    | ROH   | ROH   | N       | N           |      |
| K-L13         | S394, S242      |            | E/L         | ROH | LOH      | H                                               | H     | H      | H      | H   | LOH  | ROH   | LOH | LOH   | LOH  | H      | H    | H     | H     | M       | N           |      |
| K-L14         | S85             |            | E/L         | ROH | FS       | FS                                              | H     | LOH    | LOH    | ROH | ROH  | H     | ROH | ROH   | ROH  | H      | H    | LOH   | LOH   | N       | N           |      |
| K-L18         | S85             | S64        | E/L         | FS  | H        | H                                               | H     | LOH    | H      | LOH | H    | H     | LOH | LOH   | ROH  | LOH    | LOH  | LOH   | LOH   | N       | N           |      |
| K-L21         |                 | S69        | E/L         | H   | H        | LOH                                             | H     | ROH    | LOH    | H   | H    | ROH   | LOH | ROH   | ROH  | H      | LOH  | LOH   | H     | M       | N           |      |
| K-L24         |                 | S69        | E/L         | ROH | H        | H                                               | H     | LOH    | FS     | H   | LOH  | LOH   | H   | ROH   | ROH  | H      | H    | LOH   | H     | N       | N           |      |
| K-L27         | MYCL1, S82      | S69        | E/L         | FS  | H        | LOH                                             | FS    | LOH    | H      | H   | LOH  | LOH   | LOH | LOH   | LOH  | LOH    | H    | ROH   | ROH   | N       | N           |      |
| K-L28         | S242, L17835    | S123, S250 | E/L         | ROH | FS       | ROH                                             | H     | H      | H      | H   | LOH  | FS    | FS  | LOH   | ROH  | ROH    | H    | LOH   | LOH   | M       | N           |      |
| K-L29         | S82             |            | E/L         | ROH | H        | H                                               | H     | ROH    | LOH    | LOH | H    | H     | H   | ROH   | ROH  | LOH    | H    | LOH   | LOH   | N       | N           |      |
| K-L32         | S82             |            | E/L         | LOH | H        | ROH                                             | H     | FS     | LOH    | H   | LOH  | ROH   | ROH | LOH   | LOH  | H      | H    | LOH   | LOH   | M       | N           |      |
| K-L40         | S82             | S250       | E/L         | FS  | H        | H                                               | H     | ROH    | H      | H   | LOH  | LOH   | LOH | H     | LOH  | LOH    | H    | ROH   | ROH   | N       | N           |      |
| T-L7          | S321            |            | E/L         | ROH | H        | LOH                                             | FS    | H      | H      | H   | LOH  | LOH   | LOH | ROH   | FS   | H      | LOH  | ROH   | ROH   | N       | N           |      |
| T-L19         | S321            |            | E/L         | FS  | H        | H                                               | H     | LOH    | H      | H   | H    | LOH   | ROH | ROH   | ROH  | ROH    | LOH  | LOH   | LOH   | N       | N           |      |
| T-L30         | S321            |            | E/L         | FS  | H        | ROH                                             | H     | ROH    | LOH    | ROH | H    | LOH   | LOH | LOH   | LOH  | ROH    | H    | H     | H     | M       | N           |      |
| T-L33         |                 | S250       | E/L         | LOH | FS       | LOH                                             | FS    | LOH    | LOH    | LOH | H    | LOH   | LOH | LOH   | LOH  | ROH    | LOH  | H     | H     | N       | N           |      |
| T-L29         | S394            |            | E/L         | FS  | H        | LOH                                             | H     | LOH    | LOH    | LOH | LOH  | ROH   | ROH | H     | LOH  | LOH    | H    | H     | H     | N       | N           |      |
| K-L8          | S82             |            | E/L         | H   | H        | LOH                                             | H     | FS     | LOH    | H   | H    | ROH   | FS  | LOH   | LOH  | FS     | LOH  | H     | H     | M       | N           |      |
| T-L24         | S321            | S250       | E/L         | FS  | H        | FS                                              | ROH   | FS     | LOH    | LOH | H    | LOH   | LOH | FS    | FS   | LOH    | LOH  | LOH   | LOH   | N       | N           |      |
| T-L14         |                 | S123       | E/L         | LOH | H        | LOH                                             | H     | FS     | ROH    | H   | H    | LOH   | LOH | H     | ROH  | LOH    | LOH  | H     | H     | M       | N           |      |
| K-L16         | MYCL1           |            | E/L         | FS  | H        | FS                                              | H     | LOH    | ROH    | H   | H    | ROH   | LOH | H     | LOH  | LOH    | H    | H     | H     | N       | N           |      |
| K-L37         |                 | S64        | E/L         | H   | ROH      | FS                                              | H     | FS     | LOH    | H   | H    | ROH   | H   | LOH   | LOH  | H      | H    | LOH   | LOH   | N       | N           |      |

SUPPLEMENTARY MATERIALS: FIGURES

FIGURE 1B.

| LMs    | EMAST Markers |           | NCI Markers |       |       |        |        |     |      |       |     |       |      |        |      |       | Mutation at |         |      |      |
|--------|---------------|-----------|-------------|-------|-------|--------|--------|-----|------|-------|-----|-------|------|--------|------|-------|-------------|---------|------|------|
|        | FS at         | FS at     | Genotype    | RBM47 | WIPF2 | ANKRD5 | ZNF161 | S11 | S303 | KDM6B | MNT | S1179 | BCL2 | SEMA6D | S818 | STYK1 | BCL6B       | SMARCA2 | KRAS | BRAF |
| K-L17  | S394          |           | E/L         | LOH   | FS    | FS     | H      | FS  | LOH  | H     | FS  | ROH   | FS   | ROH    | LOH  | ROH   | LOH         | ROH     | M    | M    |
| K-29L  | MYCL1, S82    | S346      | E/L         | FS    | H     | H      | H      | LOH | LOH  | H     | LOH | LOH   | LOH  | ROH    | ROH  | H     | H           | H       | M    | N    |
| K-59L  | MYCL1, S242   |           | E/L         | ROH   | H     | ROH    | H      | LOH | LOH  | LOH   | LOH | ROH   | H    | H      | FS   | H     | LOH         | LOH     | N    | N    |
| K-61L  | MYCL1         |           | E/L         | ROH   | H     | LOH    | H      | LOH | LOH  | H     | LOH | FS    | LOH  | ROH    | FS   | ROH   | H           | LOH     | M    | N    |
| K-78L  | MYCL1, S321   |           | E/L         | ROH   | FS    | H      | H      | ROH | ROH  | H     | LOH | FS    | LOH  | LOH    | FS   | ROH   | H           | LOH     | N    | N    |
| K-80L  | MYCL1         |           | E/L         | H     | H     | ROH    | H      | LOH | H    | H     | ROH | LOH   | FS   | LOH    | LOH  | H     | H           | H       | N    | N    |
| K-122L | S82           |           | E/L         | ROH   | FS    | ROH    | H      | ROH | H    | H     | LOH | ROH   | ROH  | ROH    | LOH  | H     | LOH         | LOH     | N    | N    |
| K-L35  | S82           |           | E/L         | ROH   | H     | H      | H      | ROH | H    | H     | H   | LOH   | ROH  | ROH    | ROH  | LOH   | H           | H       | N    | N    |
| K-L38  | MYCL1         | S250      | E/L         | FS    | FS    | FS     | H      | FS  | H    | LOH   | ROH | ROH   | ROH  | H      | H    | ROH   | H           | H       | N    | N    |
| K-L36  | S242          |           | E/L         | LOH   | H     | LOH    | FS     | H   | ROH  | H     | LOH | H     | LOH  | FS     | LOH  | FS    | H           | H       | N    | N    |
| K-L25  | S82, S242     |           | E/L         | LOH   | FS    | H      | H      | H   | ROH  | LOH   | LOH | LOH   | FS   | LOH    | H    | LOH   | H           | H       | M    | N    |
| K-L9   | S321          | S123      | E/L         | H     | H     | FS     | H      | FS  | LOH  | LOH   | FS  | ROH   | LOH  | FS     | LOH  | ROH   | H           | H       | N    | M    |
| T-L1   | S321          |           | E/L         | FS    | H     | FS     | H      | H   | LOH  | ROH   | H   | FS    | ROH  | LOH    | LOH  | H     | H           | H       | N    | N    |
| T-L2   | S394          |           | E/L         | ROH   | FS    | H      | H      | ROH | LOH  | H     | LOH | H     | LOH  | LOH    | LOH  | ROH   | LOH         | LOH     | N    | N    |
| T-L11  | S321          |           | E/L         | ROH   | H     | FS     | H      | H   | H    | H     | LOH | LOH   | LOH  | LOH    | LOH  | H     | LOH         | ROH     | M    | N    |
| T-L18  |               | S123, S69 | E/L         | LOH   | H     | H      | H      | H   | LOH  | H     | H   | ROH   | LOH  | LOH    | LOH  | LOH   | H           | ROH     | N    | N    |
| T-L21  |               | S69       | E/L         | LOH   | H     | LOH    | H      | LOH | H    | H     | LOH | H     | LOH  | LOH    | ROH  | LOH   | H           | H       | N    | N    |
| T-L23  | S242          |           | E/L         | LOH   | H     | LOH    | H      | FS  | H    | H     | ROH | ROH   | LOH  | LOH    | FS   | FS    | ROH         | H       | M    | N    |
| T-L27  | S321          |           | E/L         | H     | FS    | FS     | H      | H   | ROH  | H     | LOH | LOH   | H    | LOH    | FS   | H     | H           | H       | N    | N    |
| K-L2   | S82           |           | E/L         | FS    | LOH   | LOH    | H      | LOH | ROH  | LOH   | LOH | LOH   | H    | LOH    | LOH  | LOH   | LOH         | ROH     | N    | N    |
| K-22L  | S321          |           | E/L         | ROH   | H     | LOH    | H      | LOH | ROH  | FS    | ROH | H     | FS   | FS     | ROH  | ROH   | ROH         | H       | M    | N    |
| K-63L  |               | S123      | E/L         | FS    | H     | H      | H      | FS  | FS   | H     | H   | LOH   | LOH  | LOH    | H    | FS    | LOH         | H       | M    | N    |
| K-77L  | S82           |           | E/L         | LOH   | FS    | FS     | H      | ROH | ROH  | H     | H   | LOH   | LOH  | LOH    | LOH  | ROH   | LOH         | LOH     | N    | N    |
| K-121L | S85           | S346      | E/L         | ROH   | H     | LOH    | H      | LOH | ROH  | H     | H   | ROH   | LOH  | ROH    | ROH  | ROH   | LOH         | ROH     | N    | N    |
| K-L34  | S82           |           | E/L         | LOH   | LOH   | LOH    | H      | LOH | ROH  | H     | LOH | ROH   | LOH  | LOH    | ROH  | LOH   | H           | H       | M    | N    |
| T-L5   | MYCL1         |           | E/L         | H     | H     | FS     | H      | LOH | LOH  | H     | ROH | H     | LOH  | LOH    | LOH  | LOH   | H           | H       | N    | N    |
| T-L15  | S85, S321     | S69       | E/L         | LOH   | H     | H      | H      | LOH | ROH  | LOH   | H   | ROH   | ROH  | LOH    | LOH  | H     | H           | H       | N    | N    |
| T-L20  | S321          |           | E/L         | LOH   | FS    | H      | H      | FS  | H    | LOH   | H   | ROH   | LOH  | H      | LOH  | H     | ROH         | H       | N    | N    |
| T-L12  | S242          | S123, S69 | E/L         | FS    | H     | FS     | H      | H   | FS   | H     | H   | ROH   | H    | H      | H    | FS    | FS          | ROH     | N    | N    |

FIGURE 1B (CONTINUED).

| LMs                                        | EMAST Markers  |                      | NCI Markers |       |       |        |        |      |      |       |      |       |      |        |      |       | Mutation at |         |      |      |
|--------------------------------------------|----------------|----------------------|-------------|-------|-------|--------|--------|------|------|-------|------|-------|------|--------|------|-------|-------------|---------|------|------|
|                                            | FS at          | FS at                | Genotype    | RBM47 | WIPF2 | ANKRD5 | ZNF161 | S11  | S303 | KDM6B | MNT  | S1179 | BCL2 | SEMA6D | S818 | STYK1 | BCL6B       | SMARCA2 | KRAS | BRAF |
| K-L15                                      |                |                      | MS          | FS    | FS    | H      | H      | H    | H    | H     | ROH  | LOH   | H    | H      | LOH  | H     | LOH         | LOH     | N    | N    |
| K-L11                                      |                |                      | MS          | H     | ROH   | LOH    | H      | H    | LOH  | H     | LOH  | FS    | LOH  | H      | LOH  | LOH   | H           | H       | N    | N    |
| T-L16                                      |                |                      | MS          | FS    | H     | ROH    | H      | ROH  | H    | LOH   | LOH  | ROH   | LOH  | H      | LOH  | LOH   | H           | ROH     | N    | N    |
| K-L19                                      |                |                      | MS          | LOH   | LOH   | LOH    | H      | ROH  | ROH  | H     | LOH  | H     | LOH  | LOH    | ROH  | H     | H           | H       | N    | N    |
| K-L26                                      |                |                      | MS          | ROH   | H     | ROH    | H      | LOH  | ROH  | H     | ROH  | ROH   | LOH  | H      | LOH  | H     | LOH         | ROH     | N    | N    |
| K-L33                                      |                |                      | MS          | LOH   | H     | H      | H      | LOH  | ROH  | H     | LOH  | H     | LOH  | LOH    | LOH  | ROH   | LOH         | H       | M    | N    |
| K-L23                                      |                |                      | MS          | LOH   | H     | H      | H      | H    | ROH  | H     | LOH  | LOH   | LOH  | ROH    | H    | ROH   | H           | ROH     | N    | N    |
| K-L30                                      |                |                      | MS          | LOH   | H     | LOH    | H      | ROH  | LOH  | H     | LOH  | ROH   | ROH  | ROH    | LOH  | ROH   | H           | ROH     | M    | N    |
| T-L13                                      |                |                      | MS          | H     | H     | ROH    | H      | ROH  | LOH  | H     | LOH  | ROH   | ROH  | ROH    | ROH  | H     | ROH         | ROH     | M    | N    |
| T-L22                                      |                |                      | MS          | ROH   | H     | LOH    | H      | H    | LOH  | H     | H    | H     | LOH  | LOH    | LOH  | H     | LOH         | H       | M    | N    |
| T-L25                                      |                |                      | MS          | LOH   | LOH   | H      | H      | H    | H    | LOH   | LOH  | LOH   | LOH  | ROH    | LOH  | ROH   | H           | H       | N    | N    |
| T-L32                                      |                |                      | MS          | LOH   | H     | ROH    | H      | LOH  | ROH  | H     | H    | ROH   | LOH  | H      | LOH  | ROH   | H           | ROH     | N    | N    |
| K-L10                                      |                |                      | MS          | ROH   | H     | LOH    | H      | H    | ROH  | H     | ROH  | ROH   | H    | ROH    | ROH  | ROH   | H           | ROH     | N    | N    |
| K-L3                                       |                |                      | MS          | FS    | H     | H      | H      | H    | LOH  | H     | LOH  | ROH   | H    | ROH    | LOH  | H     | H           | ROH     | M    | N    |
| K-L39                                      |                |                      | MS          | LOH   | H     | ROH    | H      | LOH  | ROH  | H     | LOH  | LOH   | LOH  | LOH    | LOH  | ROH   | LOH         | H       | N    | N    |
| K-L31                                      |                |                      | MS          | LOH   | LOH   | H      | H      | LOH  | LOH  | LOH   | LOH  | LOH   | LOH  | LOH    | ROH  | H     | H           | ROH     | N    | N    |
| T-L9                                       |                |                      | MS          | LOH   | H     | H      | H      | LOH  | LOH  | LOH   | H    | ROH   | ROH  | H      | LOH  | ROH   | H           | ROH     | M    | M    |
| T-L31                                      |                |                      | MS          | H     | H     | LOH    | H      | LOH  | ROH  | LOH   | LOH  | LOH   | LOH  | LOH    | LOH  | H     | H           | H       | N    | N    |
| K-L4                                       |                |                      | MS          | H     | H     | H      | H      | LOH  | ROH  | H     | H    | LOH   | ROH  | LOH    | ROH  | H     | H           | ROH     | M    | N    |
| K-L22                                      |                |                      | MS          | H     | H     | ROH    | H      | LOH  | ROH  | LOH   | ROH  | LOH   | H    | ROH    | ROH  | H     | H           | ROH     | N    | N    |
| K-44L                                      |                |                      | MS          | LOH   | H     | LOH    | H      | LOH  | ROH  | H     | LOH  | ROH   | H    | LOH    | LOH  | ROH   | H           | H       | N    | N    |
| T-L26                                      |                |                      | MS          | ROH   | H     | LOH    | H      | LOH  | ROH  | ROH   | ROH  | H     | ROH  | ROH    | LOH  | LOH   | H           | H       | M    | N    |
| ISI-H LM <sup>(1)</sup>                    |                |                      |             |       |       |        |        |      |      |       |      |       |      |        |      |       |             |         |      |      |
| T-L10                                      | S85, S321      | S123, BAT25<br>BAT26 | MSI-H       | N.D.  | N.D.  | N.D.   | N.D.   | N.D. | N.D. | N.D.  | N.D. | N.D.  | N.D. | N.D.   | N.D. | N.D.  | N.D.        | N.D.    | M    | N    |
| Partially characterized LMs <sup>(2)</sup> |                |                      |             |       |       |        |        |      |      |       |      |       |      |        |      |       |             |         |      |      |
| K-L12                                      | S82            |                      | E/L         | N.D.  | ROH   | H      | N.D.   | ROH  | FS   | N.D.  | LOH  | N.D.  | LOH  | ROH    | N.D. | N.D.  | LOH         | N.D.    | N    | N    |
| K-L20                                      |                | S250                 | E/L         | N.D.  | N.D.  | N.D.   | H      | N.D. | N.D. | LOH   | N.D. | N.D.  | N.D. | N.D.   | LOH  | N.D.  | N.D.        | ROH     | N.D. | N.D. |
| T-L8                                       | S85, S82, S242 | S69                  | E/L         | LOH   | N.D.  | LOH    | N.D.   | ROH  | N.D. | N.D.  | LOH  | N.D.  | LOH  | LOH    | N.D. | ROH   | H           | N.D.    | N.D. | N.D. |

**Supplementary Fig. 1****A: KRAS/BRAF mutations and Frame-shift (FS) and/or LOH of selected markers in 24 E/L positive LMs from primary CRC**

The columns depict the following: Sample ID, FS status at EMAST markers, FS status at NCI markers, Genotype, FS and/or LOH data of 15 loci and mutation data for KRAS/BRAF. For Sample ID, the samples with K number and with T number were collected at DPCNU (Kwanju, Korea) and at DPOHTU (Tokyo, Japan) respectively. For FS status at EMAST and NCI markers, the markers showing FS are listed. For genotype, all 24 LMs were categorized as E/L according to our definition in **Materials and Methods**. For FS and/or LOH data of 15 loci, a brown box with ROH indicates retention of heterozygosity; an empty color box with H indicates cases that were not informative; a yellow box with FS indicates cases with frame-shift, and a green box with LOH indicates loss of heterozygosity. Following abbreviations were used for markers *D2S123* (S123), *D17S250* (S250), *D18S64* (S64), and *D18S69* (S69), *D20S82* (S82), *D20S85* (S85), *D8S321* (S321), *D9S242* (S242), *D19S394* (S394), *D21S11* (S11), *D9S303* (S303), *D5S818* (S818) and *D8S1179* (S1179). For KRAS/BRAF mutations, a blue box with M represents presence of mutations whereas an empty color box with N represents no evidence of mutations.

**B: FS and LOH status of selected markers in additional 55 LMs from primary CRC**

The columns depict the same as the columns in Fig. S1A. . For genotype, 55 LMs were categorized as E/L, MS or MSI-H according to our definition in **Materials and Methods**. For FS and/or LOH data of 15 loci, an empty color box with N.D. indicates the status was not determined.

<sup>(1)</sup>: T-L10 exhibited MSI-H genotype. Therefore, MSI or LOH at 15 loci was not determined.

<sup>(2)</sup>: Template DNA from K-L12, L-L20 and T-L8 was not enough to analyze all of 15 loci.

SUPPLEMENTARY MATERIALS: FIGURES

**A**

| Sample | 2-4 | 505 | 6160 | 6640 | 6060 | 230 | 240 | MSI |
|--------|-----|-----|------|------|------|-----|-----|-----|
| K-125  | R   | R   | R    | R    | R    | R   | R   | E/L |
| K-122  | R   | R   | R    | R    | R    | R   | R   | MS  |
| T-190  | R   | R   | R    | R    | R    | R   | R   | E/L |
| T-129  | R   | R   | R    | R    | R    | R   | R   | E/L |
| K-116  | R   | R   | R    | R    | R    | R   | R   | E/L |
| T-116  | R   | R   | R    | R    | R    | R   | R   | MS  |
| T-114  | R   | R   | R    | R    | R    | R   | R   | E/L |
| T-122  | R   | R   | R    | R    | R    | R   | R   | MS  |
| T-125  | R   | R   | R    | R    | R    | R   | R   | MS  |
| K-112  | R   | R   | R    | R    | R    | R   | R   | E/L |
| K-195  | R   | R   | R    | R    | R    | R   | R   | E/L |
| T-121  | R   | R   | R    | R    | R    | R   | R   | E/L |
| K-80L  | R   | R   | R    | R    | R    | R   | R   | E/L |
| K-140  | R   | R   | R    | R    | R    | R   | R   | E/L |
| K-110  | R   | R   | R    | R    | R    | R   | R   | MS  |
| T-18   | R   | R   | R    | R    | R    | R   | R   | E/L |
| K-129  | R   | R   | R    | R    | R    | R   | R   | E/L |
| K-78L  | R   | R   | R    | R    | R    | R   | R   | E/L |
| K-134  | R   | R   | R    | R    | R    | R   | R   | E/L |
| T-119  | R   | R   | R    | R    | R    | R   | R   | E/L |
| T-11   | R   | R   | R    | R    | R    | R   | R   | E/L |
| K-11   | R   | R   | R    | R    | R    | R   | R   | E/L |
| T-131  | R   | R   | R    | R    | R    | R   | R   | MS  |
| K-118  | R   | R   | R    | R    | R    | R   | R   | E/L |
| K-15   | R   | R   | R    | R    | R    | R   | R   | E/L |
| K-137  | R   | R   | R    | R    | R    | R   | R   | E/L |
| K-19   | R   | R   | R    | R    | R    | R   | R   | E/L |
| K-136  | R   | R   | R    | R    | R    | R   | R   | E/L |
| K-138  | R   | R   | R    | R    | R    | R   | R   | E/L |
| T-123  | R   | R   | R    | R    | R    | R   | R   | E/L |
| K-63L  | R   | R   | R    | R    | R    | R   | R   | FSI |
| K-122L | R   | R   | R    | R    | R    | R   | R   | E/L |
| K-59L  | R   | R   | R    | R    | R    | R   | R   | E/L |
| K-61L  | R   | R   | R    | R    | R    | R   | R   | E/L |
| K-77L  | R   | R   | R    | R    | R    | R   | R   | E/L |
| K-22L  | R   | R   | R    | R    | R    | R   | R   | E/L |
| K-29L  | R   | R   | R    | R    | R    | R   | R   | E/L |
| T-12   | R   | R   | R    | R    | R    | R   | R   | E/L |
| T-127  | R   | R   | R    | R    | R    | R   | R   | E/L |
| T-15   | R   | R   | R    | R    | R    | R   | R   | E/L |
| K-115  | R   | R   | R    | R    | R    | R   | R   | MS  |
| K-18   | R   | R   | R    | R    | R    | R   | R   | E/L |

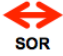

9p24.2 LOH LMs (44 Cases)

**B**

| 9p24.2 LOH-positive LM |     |     |      |      |      |     |     |     |      | Matched Primary CRC |        |       |     |      |      |      |     |     |     |      |      |     |   |
|------------------------|-----|-----|------|------|------|-----|-----|-----|------|---------------------|--------|-------|-----|------|------|------|-----|-----|-----|------|------|-----|---|
| Sample                 | 2-4 | 505 | 6160 | 6640 | 6060 | 230 | 240 | MSI | KRAS | BRAF                | Sample | 2-4   | 505 | 6160 | 6640 | 6060 | 230 | 240 | MSI | KRAS | BRAF |     |   |
| K-125                  | R   | R   | R    | R    | R    | R   | R   | E/L | M    |                     | K-125  | R     | R   | R    | R    | R    | R   | R   | E/L | M    |      |     |   |
| K-122                  | R   | R   | R    | R    | R    | R   | R   | MS  | W    |                     | K-122  | R     | R   | R    | R    | R    | R   | R   | MS  | W    |      |     |   |
| T-130                  | R   | R   | R    | R    | R    | R   | R   | E/L | M    |                     | T-130  | R     | R   | R    | R    | R    | R   | R   | FS  | E/L  | M    |     |   |
| T-129                  | R   | R   | R    | R    | R    | R   | R   | E/L | W    |                     | T-129  | R     | R   | R    | R    | R    | R   | R   | R   | E/L  | W    |     |   |
| T-116                  | R   | R   | R    | R    | R    | R   | R   | MS  | W    |                     | T-116  | R     | R   | R    | R    | R    | R   | R   | R   | MS   | W    |     |   |
| T-114                  | R   | R   | R    | R    | R    | R   | R   | E/L | M    |                     | T-114  | R     | R   | R    | R    | R    | R   | R   | R   | E/L  | M    |     |   |
| T-122                  | R   | R   | R    | R    | R    | R   | R   | MS  | M    |                     | T-122  | R     | R   | R    | R    | R    | R   | R   | L   | MS   | M    |     |   |
| T-125                  | R   | R   | R    | R    | R    | R   | R   | MS  | W    |                     | T-125  | R     | R   | R    | R    | R    | R   | R   | L   | MS   | W    |     |   |
| K-112                  | R   | R   | R    | R    | R    | R   | R   | E/L | W    |                     | K-112  | R     | R   | R    | R    | R    | R   | R   | L   | E/L  | W    |     |   |
| K-135                  | R   | R   | R    | R    | R    | R   | R   | E/L | W    |                     | K-135  | R     | R   | R    | R    | R    | R   | R   | L   | E/L  | W    |     |   |
| T-121                  | R   | R   | R    | R    | R    | R   | R   | E/L | W    |                     | T-121  | R     | R   | R    | R    | R    | R   | R   | L   | E/L  | W    |     |   |
| K-80L                  | R   | R   | R    | R    | R    | R   | R   | E/L | W    |                     | K-80L  | R     | R   | R    | R    | R    | R   | R   | L   | E/L  | W    |     |   |
| K-140                  | R   | R   | R    | R    | R    | R   | R   | E/L | W    |                     | K-140  | R     | R   | R    | R    | R    | R   | R   | L   | E/L  | W    |     |   |
| T-18                   | R   | R   | R    | R    | R    | R   | R   | E/L | W    |                     | T-18   | R     | R   | R    | R    | R    | R   | R   | L   | E/L  | W    |     |   |
| K-129                  | R   | R   | R    | R    | R    | R   | R   | E/L | W    |                     | K-129  | R     | R   | R    | R    | R    | R   | R   | L   | E/L  | W    |     |   |
| K-78L                  | R   | R   | R    | R    | R    | R   | R   | E/L | W    |                     | K-78L  | R     | R   | R    | R    | R    | R   | R   | L   | E/L  | W    |     |   |
| K-134                  | R   | R   | R    | R    | R    | R   | R   | E/L | M    |                     | K-134  | R     | R   | R    | R    | R    | R   | R   | L   | E/L  | M    |     |   |
| T-119                  | R   | R   | R    | R    | R    | R   | R   | E/L | W    |                     | T-119  | R     | R   | R    | R    | R    | R   | R   | L   | E/L  | W    |     |   |
| T-11                   | R   | R   | R    | R    | R    | R   | R   | E/L | W    |                     | T-11   | R     | R   | R    | R    | R    | R   | R   | L   | E/L  | W    |     |   |
| K-11                   | R   | R   | R    | R    | R    | R   | R   | E/L | W    |                     | K-11   | R     | R   | R    | R    | R    | R   | R   | L   | E/L  | W    |     |   |
| T-131                  | R   | R   | R    | R    | R    | R   | R   | MS  | W    |                     | T-131  | R     | R   | R    | R    | R    | R   | R   | L   | FS   | MS   | W   |   |
| K-118                  | R   | R   | R    | R    | R    | R   | R   | E/L | W    |                     | K-118  | R     | R   | R    | R    | R    | R   | R   | L   | E/L  | W    |     |   |
| K-15                   | R   | R   | R    | R    | R    | R   | R   | E/L | W    |                     | K-15   | R     | R   | R    | R    | R    | R   | R   | L   | E/L  | W    |     |   |
| K-137                  | R   | R   | R    | R    | R    | R   | R   | E/L | W    |                     | K-137  | R     | R   | R    | R    | R    | R   | R   | L   | E/L  | W    |     |   |
| K-19                   | R   | R   | R    | R    | R    | R   | R   | FS  | E/L  | M                   |        | K-19  | R   | R    | R    | R    | R   | R   | R   | L    | FS   | E/L | M |
| K-136                  | R   | R   | R    | R    | R    | R   | R   | E/L | W    |                     | K-136  | R     | R   | R    | R    | R    | R   | R   | L   | E/L  | W    |     |   |
| K-138                  | R   | R   | R    | R    | R    | R   | R   | E/L | W    |                     | K-138  | R     | R   | R    | R    | R    | R   | R   | L   | E/L  | W    |     |   |
| T-123                  | R   | R   | R    | R    | R    | R   | R   | E/L | W    |                     | T-123  | R     | R   | R    | R    | R    | R   | R   | L   | E/L  | W    |     |   |
| K-63L                  | R   | R   | R    | R    | R    | R   | R   | FS  | E/L  | M                   |        | K-63L | R   | R    | R    | R    | R   | R   | R   | L    | FS   | E/L | M |
| K-122L                 | R   | R   | R    | R    | R    | R   | R   | E/L | W    |                     | K-122L | R     | R   | R    | R    | R    | R   | R   | L   | E/L  | W    |     |   |
| K-59L                  | R   | R   | R    | R    | R    | R   | R   | E/L | W    |                     | K-59L  | R     | R   | R    | R    | R    | R   | R   | L   | E/L  | W    |     |   |
| K-61L                  | R   | R   | R    | R    | R    | R   | R   | E/L | M    |                     | K-61L  | R     | R   | R    | R    | R    | R   | R   | L   | FS   | E/L  | M   |   |
| K-77L                  | R   | R   | R    | R    | R    | R   | R   | E/L | W    |                     | K-77L  | R     | R   | R    | R    | R    | R   | R   | L   | E/L  | W    |     |   |
| K-22L                  | R   | R   | R    | R    | R    | R   | R   | E/L | M    |                     | K-22L  | R     | R   | R    | R    | R    | R   | R   | L   | FS   | E/L  | M   |   |
| K-29L                  | R   | R   | R    | R    | R    | R   | R   | E/L | M    |                     | K-29L  | R     | R   | R    | R    | R    | R   | R   | L   | E/L  | M    |     |   |
| T-12                   | R   | R   | R    | R    | R    | R   | R   | E/L | W    |                     | T-12   | R     | R   | R    | R    | R    | R   | R   | L   | E/L  | W    |     |   |
| T-127                  | R   | R   | R    | R    | R    | R   | R   | E/L | W    |                     | T-127  | R     | R   | R    | R    | R    | R   | R   | L   | E/L  | W    |     |   |
| T-15                   | R   | R   | R    | R    | R    | R   | R   | E/L | W    |                     | T-15   | R     | R   | R    | R    | R    | R   | R   | L   | FS   | E/L  | W   |   |
| K-115                  | R   | R   | R    | R    | R    | R   | R   | E/L | W    |                     | K-115  | R     | R   | R    | R    | R    | R   | R   | L   | E/L  | W    |     |   |
| K-18                   | R   | R   | R    | R    | R    | R   | R   | E/L | M    |                     | K-18   | R     | R   | R    | R    | R    | R   | R   | L   | E/L  | M    |     |   |

9p24.2 ROH LMs (30 Cases)

**Supplementary Fig. 2**

**A: FS and 9p24.2 LOH status of 74 LMs**

This figure provides detailed data from 74 LMs. The columns depict the following: LOH data for 7 markers (2-4, 505, 6160, 6640, 6060, 230, and 240) and MSI status. For LOH data, a brown box with R indicates retention of heterozygosity (ROH); a gray box with X indicates cases that were not informative; a gray box with FS indicates cases with frame-shifts, and a green box with L indicates loss of heterozygosity (LOH). For MSI status E/L indicates EMAS/MSI-L and MS indicates cases with highly stable microsatellites. Two markers, 2-4 and 505, localized within the SMARCA2 gene. The smallest overlapping region of LOH among 9p24.2 LOH-positive LMs is banded by 6160 and 6060 (red arrow).

**B: FS, 9p24.2 LOH, and KRAS/BRAF mutation status in 61 matching LMs and metastatic primary CRCs**

This figure provides detailed data from 61 LMs (left column) and matching primary CRCs (right column). In contrast to the LMs, no SOR was detected in matching primary CRC.

SUPPLEMENTARY MATERIALS: FIGURES

**A**

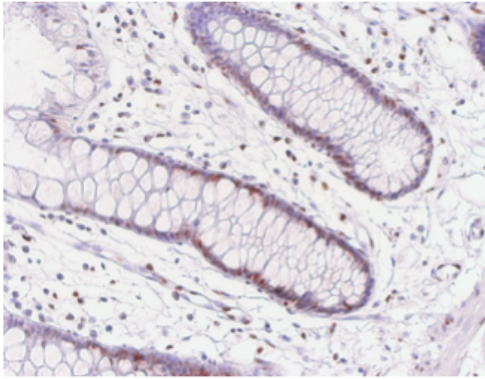

**B**

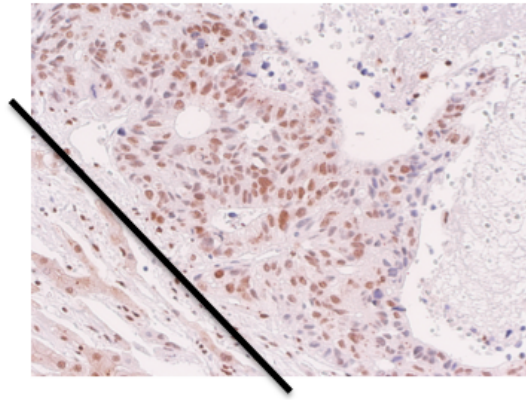

**C**

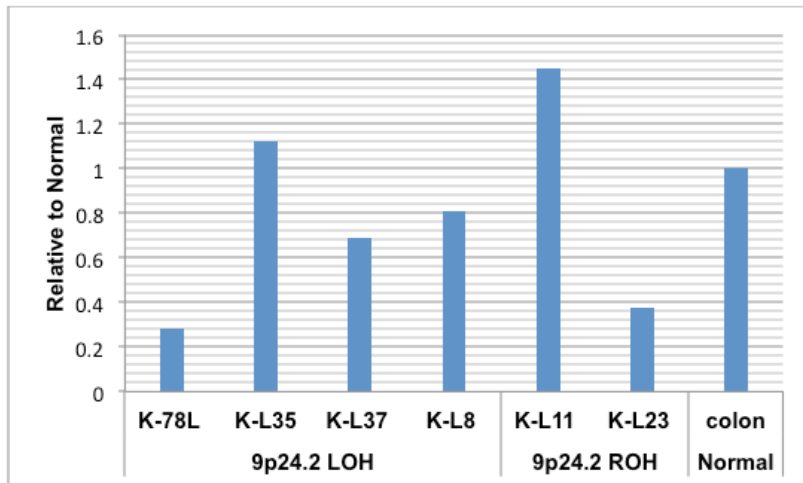

**Supplementary Fig. 3 Expression of SMARCA2 in normal human colon and LMs from primary CRC**

Formalin-fixed paraffin-embedded (FFPE) tissues were deparaffinized and rehydrated. After antigen retrieval [121°C for 15 min in 0.01 mol/L citrate buffer (pH 6.0)], the tissues were treated with anti-SMARCA2 antibody (1:250, HPA029981, Sigma) overnight at 4°C, followed by incubation with secondary antibody. Staining was developed by diaminobenzide chromogen and counterstained with hematoxylin. The brown signals in nucleus indicated the presence of SMARCA2. Normal colon tissues and six 9p24.2 LOH-positive LM tissues were examined. There was no difference in the levels of SMARCA2 expression between normal colon and 9p24.2 LOH-positive LMs. **A:** Normal colon, **B:** 9p24.2 LOH-positive LM. A metastasis tissue locates at upper right side of a black line and normal liver cells are visible at lower left side of a black line. **C:** mRNAs were isolated from FFPE LMs and normal tissues and were subjected to cDNA synthesis. qRT-PCR was performed to compare the expression levels of *SMARCA2* in LMs exhibiting 9p24.2 LOH (K-78L, K-L35, K-L37 and K-L8) or 9p24.2 ROH (K-L11 and k-L23) to those in normal colon tissues. For normalization, the expressions of house-keeping genes *TXNR1* and *PSBM6* were used. Relative expression of the *SMARCA2* in LM vs normal colon was determined by qBase<sup>+</sup> software (Biogazelle, Belgium). No correlation between the levels of *SMARCA2* mRNA and presence or absence of 9p24.2 LOH in LMS was observed.

SUPPLEMENTARY MATERIALS: FIGURES

| Position on Chromosome 9 | Ave. Depth | Germline>Somatic Mut./Percentage of Somatic Mut.<br>in Cases No. |           |           |           |             | Location of Variants<br>in the SMARCA2 |
|--------------------------|------------|------------------------------------------------------------------|-----------|-----------|-----------|-------------|----------------------------------------|
|                          |            | 1                                                                | 2         | 3         | 4         | 5           |                                        |
|                          |            |                                                                  |           |           |           |             |                                        |
| 2015442                  | 93         |                                                                  |           |           |           | T>C/3.2     | Intronic                               |
| 2017135                  | 49.5       |                                                                  | G>C/2.5   |           |           |             | Intronic                               |
| 2017216                  | 58.5       | G>A/2.3                                                          |           |           |           |             | Intronic                               |
| 2030564                  | 86         |                                                                  |           |           | A>T/2.1   |             | Intronic                               |
| 2030574                  | 98.75      |                                                                  |           |           | T>C/4.4   |             | Intronic                               |
| 2035008_2035009          | 219        |                                                                  |           |           |           | insTTTA/3.6 | Intronic                               |
| 2035203                  | 67.5       |                                                                  |           | A>G/3.9   |           |             | Intronic                               |
| 2035223                  | 106.25     |                                                                  |           | A>G/4.7   |           | A>G/3.1     | Intronic                               |
| 2035231                  | 130        |                                                                  |           | A>G/4.0   |           |             | Intronic                               |
| 2047446                  | 29         | C>A/6.5                                                          |           |           |           |             | Coding (Synonymous)                    |
| 2052295                  | 223        |                                                                  |           |           | A>G/2.0   |             | Intronic                               |
| 2052334                  | 161        |                                                                  |           |           | C>T/2.7   |             | Intronic                               |
| 2065021                  | 194        |                                                                  |           | del A/3.3 |           |             | Intronic                               |
| 2069521                  | 86         | C>T/2.5                                                          |           |           |           |             | Intronic                               |
| 2078842                  | 83.5       |                                                                  | A>G/2.5   |           |           |             | Intronic                               |
| 2082308                  | 276        |                                                                  |           | del T/5.2 |           |             | Intronic                               |
| 2085518                  | 766.25     |                                                                  |           |           |           | A>G/63.0    | Intronic                               |
| 2095308                  | 116.5      | A>T/2.1                                                          |           |           |           |             | Intronic                               |
| 2095312                  | 125        | C>T/2.0                                                          |           |           |           |             | Intronic                               |
| 2095325                  | 29         |                                                                  |           |           | T>C/33.0  |             | Intronic                               |
| 2095335                  | 47         |                                                                  |           |           | C>T/6.3   |             | Intronic                               |
| 2095336                  | 53.5       |                                                                  |           |           | G>A/5.0   |             | Intronic                               |
| 2098837                  | 157        |                                                                  |           |           |           | T>C/2.2     | Intronic                               |
| 2098852                  | 216.5      | A>C/2.0                                                          |           |           |           |             | Intronic                               |
| 2100703                  | 23.5       | del A/10.0                                                       |           |           |           |             | Intronic                               |
| 2115042                  | 597        |                                                                  |           | del T/6.0 |           |             | Intronic                               |
| 2125639                  | 131.5      |                                                                  |           |           |           | A>G/2.1     | Intronic                               |
| 2133475                  | 81.5       | A>G/2.1                                                          |           |           |           |             | Intronic                               |
| 2133477                  | 82         | G>C/2.2                                                          |           |           |           |             | Intronic                               |
| 2133484                  | 86         | A>T/2.0                                                          |           |           |           |             | Intronic                               |
| 2136368                  | 114.75     |                                                                  | G>A/2.2   |           | G>A/2.2   |             | Intronic                               |
| 2144071                  | 595.5      |                                                                  |           | del G/1.9 |           |             | Intronic                               |
| 2147692                  | 98.5       |                                                                  | G>A/2.2   |           |           |             | Intronic                               |
| 2147702                  | 75         |                                                                  | G>C/2.9   |           |           |             | Intronic                               |
| 2147703                  | 75.5       |                                                                  | G>A/2.8   |           |           |             | Intronic                               |
| 2147706                  | 71.5       |                                                                  | C>T/2.9   |           |           |             | Intronic                               |
| 2147727                  | 50         |                                                                  | A>G/4.1   |           |           |             | Intronic                               |
| 2151674                  | 38         |                                                                  |           |           | A>G/4.3   |             | Intronic                               |
| 2152807                  | 31.5       |                                                                  |           |           |           | A>G/7.7     | Intronic                               |
| 2156451                  | 135.5      | C>T/1.9                                                          |           |           |           |             | Intronic                               |
| 2156505                  | 82         |                                                                  |           | T>C/4.2   |           |             | Intronic                               |
| 2156515                  | 66.5       |                                                                  |           | A>C/5.1   |           |             | Intronic                               |
| 2156520                  | 89.5       |                                                                  | del C/2.3 |           |           |             | Intronic                               |
| 2156523                  | 65.5       |                                                                  |           | del G/4.8 |           |             | Intronic                               |
| 2158154                  | 521.5      |                                                                  |           | G>C/70.0  |           |             | Intronic                               |
| 2158653_2158654          | 664.5      |                                                                  |           |           |           | del T/2.0   | UTR                                    |
| 2158662                  | 589        |                                                                  |           |           |           | del G/4.5   | UTR                                    |
| 2163460                  | 1658.5     |                                                                  | C>T/53.0  |           |           |             | Intronic                               |
| 2174253                  | 1164.75    |                                                                  | C>G/1.9   |           |           |             | Intronic                               |
| 2176048                  | 77         |                                                                  |           |           |           | del T/3.8   | Intronic                               |
| 2177677_2177678          | 139.5      |                                                                  |           |           | del A/2.5 |             | Intronic                               |
| 2177682                  | 136        |                                                                  |           |           | del A/2.5 |             | Intronic                               |
| 2177685                  | 122.5      |                                                                  |           |           | C>T/4.8   |             | Intronic                               |
| 2177701                  | 101.5      |                                                                  |           |           | C>A/4.4   |             | Intronic                               |
| 2182884                  | 57         |                                                                  |           |           | T>A/3.3   |             | Intronic                               |
| 2182907                  | 79.5       |                                                                  |           |           | T>C/2.4   |             | Intronic                               |
| 2182923                  | 80.5       |                                                                  | T>C/2.6   |           |           |             | Intronic                               |
| 2184430                  | 94         |                                                                  | G>A/2.1   |           |           |             | Intronic                               |
| 2184861                  | 1370       |                                                                  | T>G/53.2  |           |           |             | Intronic                               |
| 2187484                  | 226.5      |                                                                  |           | T>C/2.1   |           |             | Intronic                               |
| 2188383                  | 1545.5     |                                                                  | A>G/2.2   |           |           |             | Intronic                               |
| 2194334                  | 228        | C>T/2.7                                                          |           |           |           |             | Downstream                             |

## SUPPLEMENTARY MATERIALS: FIGURES

### Supplementary Fig. 4

**Targeted deep sequencing of the *SMARCA2* locus** To determine whether tumor-specific recurrent sequence variants within the *SMARCA2* region exist, genomic DNAs isolated from five matching normal/tumor pairs exhibiting 9p24.2 LOH were subjected to a targeted deep sequencing. A region of about 180 kb containing the *SMARCA2* locus (Chr9: 2,015,311-2,194,334) was analyzed after sequencing by Hybrid Capture method with the SureSelect Target Enrichment System and on Illumina instruments. Variant calling was performed by Mutect and VarScan. The columns depict the following: position of a sequence variant on chromosome 9, average depth of sequence reading, sequence variants and their frequencies in each sample, and location of variant within the *SMARCA2* gene. For variants and their frequencies, a variant in a green box is called by both Mutect and VarScan, one in a blue box is called by VarScan with high confidence, a variant in a yellow box is called by VarScan only with low confidence, and the one in brown box is called by Mutect only. For a variant location within *SMARCA2*, an each variant was located at intronic, coding, 3' untranslated region (UTR), or down-stream region. Although 64 sequence variants were detected among 5 tumor samples when compared to matching normal samples, most of them were found in intron of the *SMARCA2* and at a low frequency (1.9%~30%) suggesting that these alterations might have occurred after LOH event. Even though 4 sequence variants with high frequency (more than 50%) were detected, they are at the intron and sporadic among 5 tumor samples. We conclude that there was no recurrent mutation in the *SMARCA2* locus in 9p24.2 LOH-positive tumors.

SUPPLEMENTARY MATERIALS: FIGURES

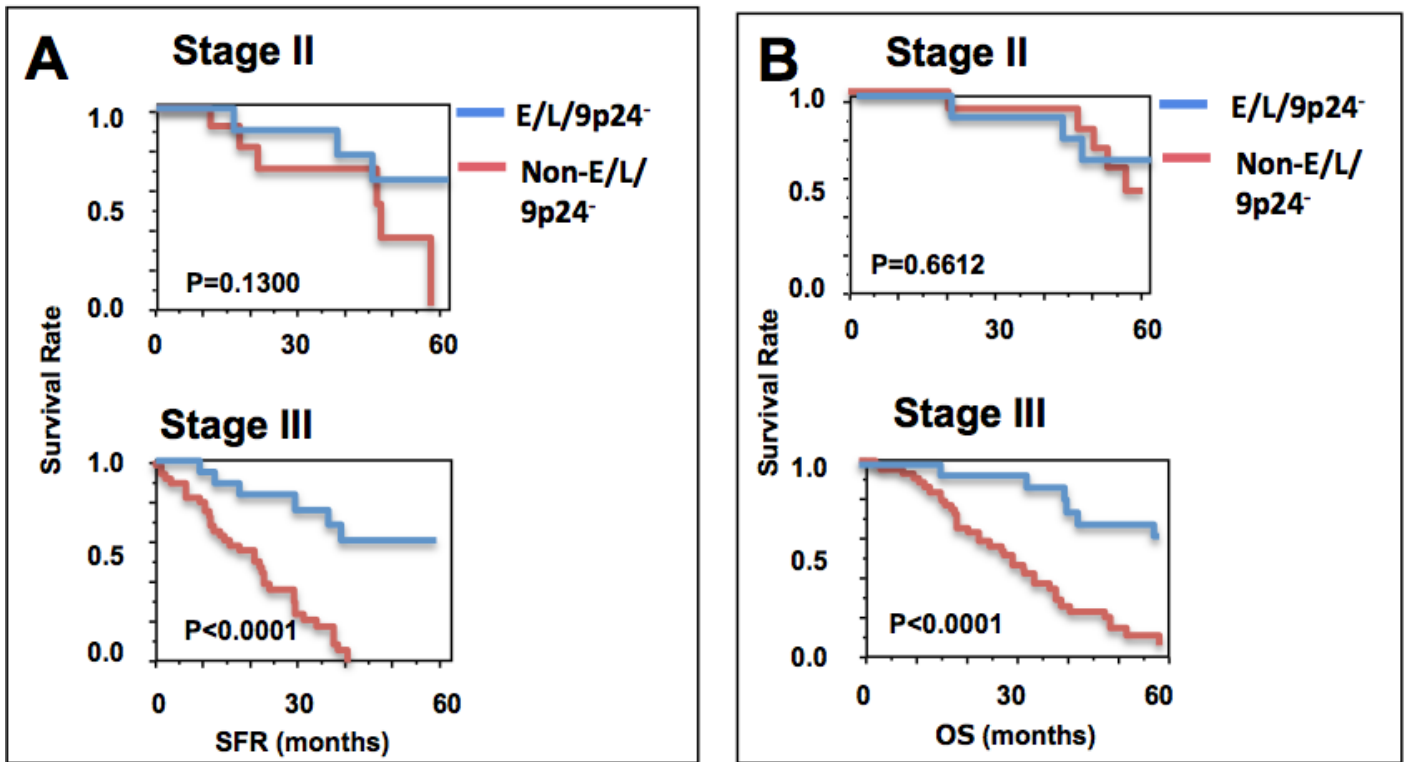

Supplementary Fig.5

Kaplan-Meier curves for SFR or OS of patients with Stage III (n=67) or patients with Stage II (n=21). The SFR was compared between patients with primary CRC exhibiting E/L/9p24<sup>-</sup> (blue line: Stage III, n=45; Stage II, n=9) and non-E/L/9p24<sup>-</sup> (red line: Stage III, n=22; Stage II, n=12) in Stage II (**upper**) or III (**bottom**) CRC.

(A), The OS was compared between patients with primary CRC exhibiting E/L/9p24<sup>-</sup> (blue line) and non-E/L/9p24<sup>-</sup> (red line) in Stage II (**upper**) or III (**bottom**) (B). The X-axis represents SFR or OS in months. The Y-axis represents survival rates. P values were determined by log-rank test.



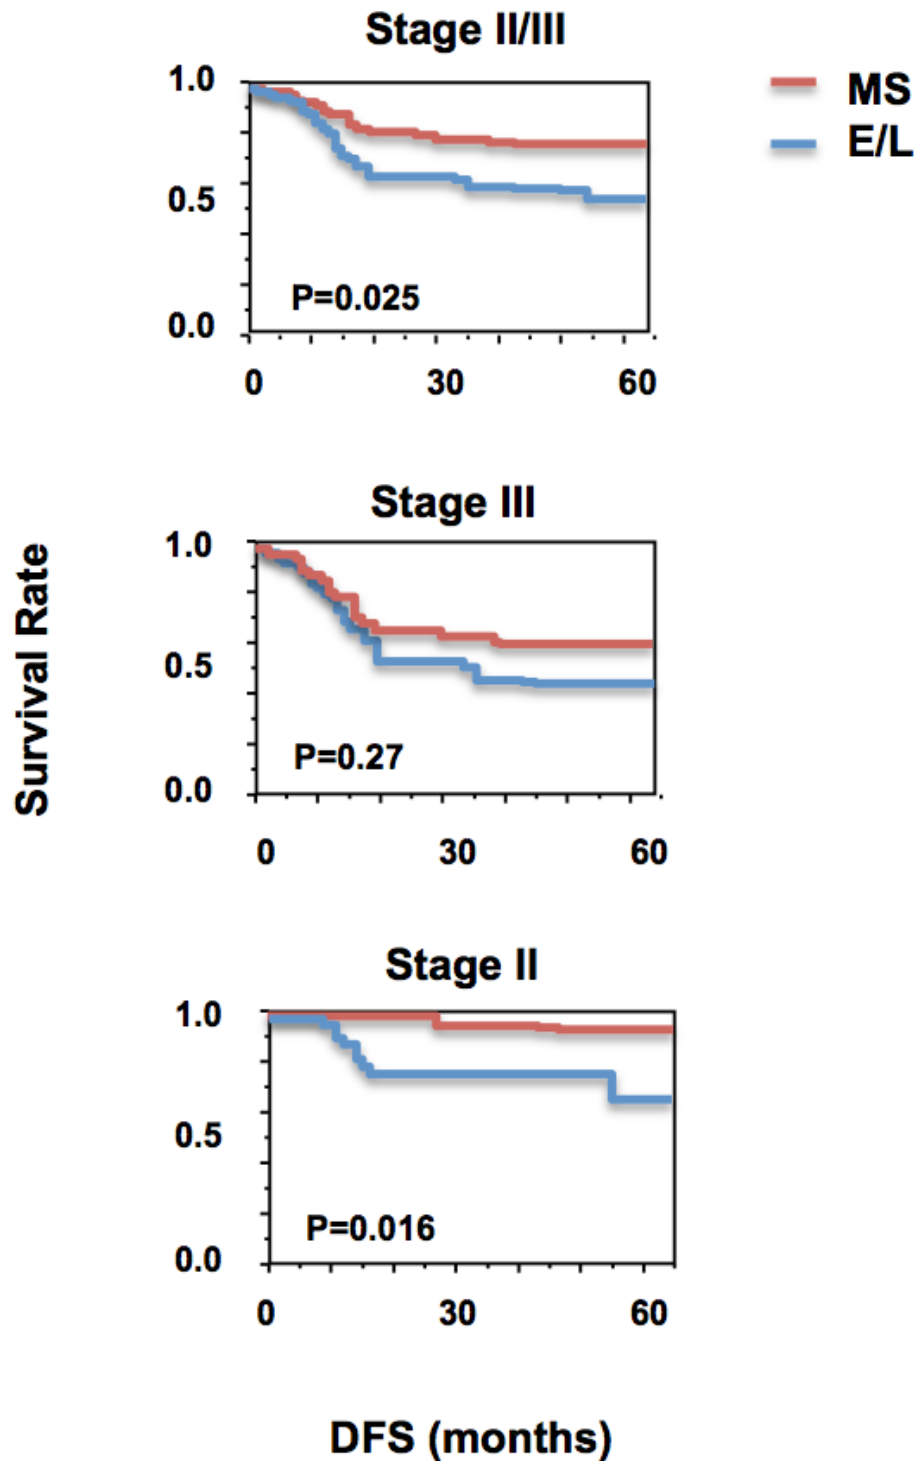

Supplementary Fig. 6

Kaplan-Meier curves for DFS of patients with Stage II/III (n=124), Stage III (n=75) and Stage II CRCs (n=50). DFS was compared between patients with primary CRC exhibiting E/L (blue line) and non-E/L (red line) in Stage II plus III primary CRC (**upper**), Stage III primary CRC (**middle**) or in Stage II primary CRC (**bottom**). Stage II/III :E/L (n=65) vs non-E/L (n=59), Stage III: E/L (n=41) vs non-E/L (n=34), Stage II: E/L (n=24) vs non-E/L (n=26). The X-axis represents DFS in months. The Y-axis represents survival rates. P values were determined by log-rank test.

## SUPPLEMENTARY MATERIALS: FIGURES

### **Supplementary References**

1. Haugen A *et al.* (2008) Genetic instability caused by loss of MutS homologue 3 in human colorectal cancer. *Cancer Res* **68**:8465–8472.
2. Schuelke M. (2000) An economic method for the fluorescent labeling of PCR fragments. *Nat Biotech* 18:233-234.
3. Kozłowski P, de Mezer M, Krzyżosiak WJ (2010) Trinucleotide repeats in human genome and exome. *Nucleic Acids Res* 38:4027-4039.
4. Missirlis PI *et al.* (2005) Satellog: a database for the identification and prioritization of satellite repeats in disease association studies. *BMC Bioinformatics* 6:145.
5. Bacolla A *et al.* (2008) Abundance and length of simple repeats in vertebrate genomes are determined by their structural properties. *Genome Res* 18:1545-1553.
