# Supplementary material
Source: PubMed Central journal article supplement (PMC4808397)
Supplement: NIHMS748828-supplement-3.pdf [file NIHMS748828-supplement-3.pdf]

SUPPLEMENTARY MATERIALS: TABLES

**Elevated microsatellite alterations with allelic loss on 9p24.2 signify less aggressive metastasis in colorectal cancer**

Minoru Koi,<sup>1,2</sup> Melissa Garcia,<sup>2</sup> Chan Choi,<sup>3</sup> Hyeong-Rok Kim,<sup>4</sup> Junichi Koike,<sup>5</sup> Hiromichi Hemmi,<sup>6</sup> Takeshi Nagasaka,<sup>7</sup> Yoshinaga Okugawa,<sup>2,8</sup> Yuji Toiyama,<sup>8</sup> Takahito Kitajima,<sup>8</sup> Hiroki Imaoka,<sup>8</sup> Masato Kusunoki,<sup>8</sup> Yin-Hsiu Chen,<sup>9</sup> Bhramar Mukherjee,<sup>9</sup> C Richard Boland,<sup>2</sup> John M Carethers<sup>1</sup>

SUPPLEMENTARY TABLES

**Supplementary Table1: The distribution of clinical and genetic variables for the 79 LMs included in Tumor Set #1**

| Variables <sup>a)</sup>    | Number of Cases (%)            | Association with <sup>b)</sup> |                     |                  |               |
|----------------------------|--------------------------------|--------------------------------|---------------------|------------------|---------------|
|                            |                                | E/L                            | KRAS/BRAF Mutations | Overall Survival |               |
| <b>Sample Source</b>       | Toho (DPOHTU) vs Korea (DPCNU) | 28 vs 51                       | 0.701               | 0.953            | 0.495         |
| <b>Age</b>                 | <62 vs >62                     | 41 vs 38                       | 0.643               | 0.812            | 0.425         |
| <b>Sex</b>                 | Female vs Male                 | 26 vs 53                       | 0.821               | <b>0.046</b>     | 0.997         |
| <b>Primary Tumor Grade</b> | G1 vs G2&G3                    | 25 vs 54                       | 0.882               | 0.424            | 0.138         |
| <b>Primary Tumor Sites</b> | Proximal vs Distal             | 10 vs 69                       | 0.502               | 0.656            | 0.088         |
| <b>Primary Tumor Type</b>  | Colon vs Rectum                | 36 vs 43                       | 0.083               | 0.568            | 0.888         |
| <b>Metastasis</b>          | Metachronous vs Synchronous    | 38 vs 41                       | 0.599               | 0.574            | <b>0.0006</b> |
| <b>MSI Status</b>          | MSI-H vs MSI-L vs MSS          | 1 vs 22 vs 56                  | N.A.                | 0.88             | 0.596         |
|                            | EMAST vs non-EMAST             | 47 vs 32                       | N.A.                | 0.374            | 0.174         |
|                            | E/L vs MS                      | 56 vs 22                       | N.A.                | 0.69             | 0.843         |
| <b>KRAS/BRAF Mutation</b>  | Mutated vs Wild-Type           | 26 vs 51                       | 0.517               | N.A.             | 0.867         |

<sup>a)</sup> Age: The average age of this set is ~62 years old. 62 was used as cut-off value for defining age group. Primary Tumor Grade, Sites and Type are those of primary CRC from which these 79 LMs were derived. KRAS mutations were examined in codons 12 and 13, and BRAF mutations were examined in codon 600.

<sup>b)</sup> Association between E/L or KRAS/BRAF mutations and each variable was examined by univariate logistic regression analysis.

Association between OS and each variable was examined by univariate Cox hazards regression analysis.

Each number represents p value. Undelined bolted numbers are significant. KRAS/BRAF mutations were associated with males. Shorter OS was associated with synchronous LM.

SUPPLEMENTARY MATERIALS: TABLES

Supplementary Table 2. 141 loci examined for FS/LOH in 24 E/L positive

LMs

Gene with dinucleotide repeats  
(44 genes)

| Gene     | Cancer <sup>a</sup> | Repeats | No. Unit | Posotion | Frame-shifts Freq.(%) <sup>b</sup> | LOH Freq.(%) |
|----------|---------------------|---------|----------|----------|------------------------------------|--------------|
| MNT      | Y                   | CA      | 23       | 3'       | 0/24                               | 12/14 (86)   |
| SEMA6D   | Y                   | CA      | 22       | 3'       | 1/24 (4)                           | 11/18 (61)   |
| FGF3     | Y                   | CA      | 29       | 3'       | 0/24                               | 8/19 (42)    |
| MLH3     | Y                   | CA      | 13       | intron   | 0/24                               | 5/14 (36)    |
| IGF1     | Y                   | CA      | 22       | 3'       | 0/23                               | 1/13 (8)     |
| PAX5     | Y                   | CA      | 21       | 3'       | 0/24                               | 4/12 (33)    |
| ZEB1     | Y                   | CA      | 19       | 3'       | 0/24                               | 4/20 (20)    |
| PTP4A2   | Y                   | CA      | 25       | 3'       | 0/24                               | 2/20 (10)    |
| SNX20    | Y                   | CA      | 21       | 3'       | 0/24                               | 4/12 (33)    |
| CNOT3    | Y                   | CA      | 18       | 5'       | 0/24                               | 4/17 (24)    |
| PHF17    | Y                   | CA      | 23       | 3'       | 0/24                               | 4/21 (19)    |
| STYK1    | Y                   | CA      | 11       | 3'       | 1/24 (4)                           | 9/15 (60)    |
| MAPKAPK2 | Y                   | CA      | 15       | 3'       | 0/14                               | 1/7 (14)     |
| NDRG4    | Y                   | CA      | 14       | 3'       | 0/21                               | 2/8 (25)     |
| AKAP11   | Y                   | CA      | 21       | 3'       | 0/22                               | 0/6          |
| MAP2     | Y                   | CA      | 16       | 3'       | 0/21                               | 1/10 (10)    |
| BMP4     | Y                   | CA      | 16       | 3'       | 0/24                               | 0/1          |
| RDX      | Y                   | CA      | 15       | 3'       | 0/24                               | 3/10 (30)    |
| SATB1    | Y                   | CA      | 18       | 3'       | 0/22                               | 1/3 (33)     |
| FASLG    | Y                   | CA      | 15       | 3'       | 0/24                               | 0/1          |
| MACC1    | Y                   | CA      | 49       | 3'       | 0/20                               | 1/4 (25)     |
| NLK      | Y                   | CA      | 16       | 3'       | 0/24                               | 1/11 (9)     |
| PTGES    | Y                   | CA      | 24       | 3'       | 0/24                               | 5/19 (26)    |
| HIF1β    | Y                   | CA      | 15       | 3'       | 0/24                               | 4/12 (33)    |
| MAPK10   | Y                   | CA      | 16       | 3'       | 0/23                               | 0/20         |
| EFNB1    | Y                   | CA      | 14       | 3'       | 0/24                               | 0/6          |

| Gene                                         | Can cer | Repeats         | No. Unit | Posot ion | Frame-shifts Freq.(%) | LOH Freq.(%) |
|----------------------------------------------|---------|-----------------|----------|-----------|-----------------------|--------------|
| UBLCP1                                       | N       | CA              | 24       | 3'        | 0/21                  | 0/13         |
| ATF1                                         | Y       | CA              | 8        | 3'        | 0/24                  | 0/0          |
| SNAIL2                                       | Y       | CA              | 15       | 3'        | 0/24                  | 0/0          |
| SMAD7                                        | Y       | CA              | 11       | 3'        | 0/24                  | 0/0          |
| ENOS                                         | Y       | CA              | 34       | intron    | 0/12                  | 0/11         |
| PTPRT                                        | Y       | CA              | 25       | intron    | 0/23                  | 1/14 (7)     |
| DUSP10                                       | Y       | CA              | 20       | intron    | 0/24                  | 0/0          |
| MSH3                                         | Y       | CA              | 20       | intron    | 0/24                  | 0/14         |
| TMPRSS2                                      | Y       | CA              | 21       | intron    | 0/24                  | 0/0          |
| PTEN                                         | Y       | CA              | 19       | intron    | 0/24                  | 4/12 (33)    |
| EGFR                                         | Y       | CA              | 16       | intron    | 0/22                  | 0/8          |
| MSH6                                         | Y       | CA              | 17       | intron    | 0/24                  | 0/0          |
| DEC1                                         | Y       | CA              | 24       | intron    | 0/24                  | 5/15 (33)    |
| LMO1                                         | Y       | CA              | 15       | 5'        | 1/24 (4)              | 5/19 (26)    |
| BMP3                                         | Y       | CA              | 17       | 5'        | 0/24                  | 0/0          |
| CLEC2B                                       | Y       | CA              | 10       | 5'        | 0/24                  | 6/14 (43)    |
| XPO5                                         | Y       | CA              | 24       | intron    | 2/24 (8)              | 1/3 (33)     |
| MAF                                          | Y       | CA              | 23       | 3'        | 0/24                  | 6/17 (35)    |
| Gene with tetranucleotide repeats (33 genes) |         |                 |          |           |                       |              |
| SLC5A12                                      | Y       | AAAG            | 13       | 3'        | 1/24 (4)              | 2/13 (15)    |
| RBM47                                        | N       | AAAG            | 16       | 3'        | 9/24 (38)             | 4/11 (36)    |
| FZD4                                         | Y       | CAAA<br>ATGA,TA | 8        | 3'        | 1/23 (4)              | 3/12 (25)    |
| ANKRD5                                       | N       | GA              | 5,10     | 3'        | 4/24 (17)             | 9/13 (69)    |
| BCL2(D18S51)                                 | Y       | AAAG            | 18       | intron    | 2/24 (8)              | 15/19 (79)   |
| HDAC4                                        | Y       | TAGA            | 9        | 3'        | 0/21                  | 4/13 (31)    |
| KCNK2                                        | Y       | TAGA            | 13       | 3'        | 0/20                  | 6/13 (46)    |

<sup>a</sup>Y: The locus has been associated with cancer; N: no association has been reported; N.A.:not applicable.

SUPPLEMENTARY MATERIALS: TABLES

<sup>b</sup>Mutation frequency was calculated by dividing the number of mutated cases by the number of informative cases.

Supplementary Table 2. cont. 141 loci examined for FS/LOH in 24 E/L positive LMs

| Gene with tetranucleotide repeats (33 genes) cont. |        |         |          |                 |                       |              | Genes with trinucleotide repeats (64 genes) |                     |         |          |          |                                    |                |
|----------------------------------------------------|--------|---------|----------|-----------------|-----------------------|--------------|---------------------------------------------|---------------------|---------|----------|----------|------------------------------------|----------------|
| Gene                                               | Cancer | Repeats | No. Unit | Position        | Frame-shifts Freq.(%) | LOH Freq.(%) | Gene                                        | Cancer <sup>a</sup> | Repeats | No. Unit | Position | Frame-shifts Freq.(%) <sup>b</sup> | LOH Freq.(%)   |
| D5S818                                             | N.A.   | AGAT    | 11       | intergeni<br>c  | 2/24 (8)              | 11/19 (58)   | WIPF2                                       | Y                   | CGG     | 9        | 5'       | 3/24<br>(13)                       | 1/4<br>(25)    |
| D13S317                                            | N.A.   | TATC    | 11       | intergene<br>ic | 0/24                  | 5/21 (24)    | KDM6B                                       | Y                   | CCA     | 12       | exon     | 0/24                               | 5/7<br>(71)    |
| KMO                                                | N      | TAGA    | 19       | 3'              | 2/24 (8)              | 6/17 (35)    | SMARCA2                                     | Y                   | CAG     | 20       | exon     | 0/24                               | 8/13<br>(62)   |
| D21S11                                             | N.A.   | TAGA    | 11       | intergeni<br>c  | 6/24 (25)             | 10/15 (67)   | BCL6B                                       | Y                   | CAG     | 9        | exon     | 0/24                               | 9/10<br>(90)   |
| DAP3                                               | Y      | AAAT    | 10       | 3'              | 2/23 (9)              | 0/13         | NADK                                        | N                   | GGA     | 8        | exon     | 0/20                               | 3/9<br>(33)    |
| TBX19                                              | Y      | AAAG    | 6        | 3'              | 0/24                  | 2/19 (11)    | UBE2B                                       | Y                   | CGG     | 10       | 5'       | 0/19                               | 2/6<br>(33)    |
| SHROOM4                                            | N      | AAAG    | 15       | 3'              | 0/23                  | 0/3          | PRKCSH                                      | N                   | GAG     | 19       | exon     | 1/23 (4)                           | 3/9<br>(33)    |
| ORC6L                                              | Y      | TAGA    | 13       | 3'              | 0/24                  | 3/8 (38)     | KCNN3                                       | Y                   | CAG     | 13, 14   | exon     | 2/24 (8)                           | 3/13<br>(23)   |
| TPOX                                               | N.A.   | TGAA    | 8        | intron          | 1/24 (4)              | 2/14 (14)    | GABRA4                                      | N                   | AAT     | 14       | 3'       | 0/20                               | 2/10<br>(20)   |
| NHLH1                                              | Y      | TTTA    | 13       | 3'              | 0/24                  | 0/11         | MTMR9                                       | N                   | GTT     | 8        | 3'       | 0/24                               | 2/8<br>(25)    |
| C20ORF56                                           | N      | AAAG    | 14       | 3'              | 1/24 (4)              | 1/13(8)      | DMPK                                        | Y                   | CAG     | 20       | 3'       | 0/21                               | 2/12<br>(17)   |
| PMP2                                               | N      | TAGA    | 14       | 3'              | 0/24                  | 0/0          | GRIK2                                       | Y                   | AAT     | 14       | 3'       | 0/21                               | 0/0            |
| SNX1                                               | Y      | GATA    | 16       | 3'              | 1/23 (4)              | 4/13 (31)    | PDCD1                                       | Y                   | CAG     | 10       | 3'       | 0/24                               | 1/3<br>(33)    |
| D2S1338                                            | N.A.   | AAGG    | 13       | intergeni<br>c  | 2/24 (8)              | 0/15         | SPRY4                                       | Y                   | AAC     | 10       | 3'       | 0/24                               | 0/11<br>(6/15) |
| D9S303                                             | N.A.   | GATA    | 12       | intron          | 1/24 (4)              | 13/16 (81)   | PRDM10                                      | N                   | AAG     | 10       | 3'       | 0/23                               | (40)           |
| SNX27                                              | N      | AAAG    | 20       | 3'              | 0/27                  | 1/5 (20)     | HERC5                                       | N                   | AAC     | 9        | 3'       | 0/24                               | 0/0            |
| D8S1179                                            | N.A.   | TAGA    | 11       | intron          | 1/24 (4)              | 9/17 (53)    | ARCN1                                       | N                   | ATT     | 9        | 3'       | 0/22                               | 0/0<br>(8/17)  |
| PLEKHG4B                                           | N      | TAGA    | 10       | 3'              | 0/24                  | 2/13 (15)    | ZNF516                                      | N                   | AAC     | 9        | 3'       | 0/22                               | (47)           |
| KANK2                                              | N      | GGAT    | 13       | 3'              | 1/24 (4)              | 8/17 (47)    | ZNF790                                      | N                   | CAG     | 9        | 3'       | 0/22                               | 0/8            |
| PLCXD3                                             | N      | GGAA    | 12       | 3'              | 0/24                  | 7/19 (37)    | SIRPA                                       | Y                   | ACC     | 9        | 3'       | 0/22                               | 0/0            |
| ZFR2                                               | N      | CAAA    | 9        | 3'              | 0/24                  | 0/0          | RREB1                                       | Y                   | ATT     | 8        | 3'       | 0/24                               | 0/2<br>(2/13)  |
| RTKN2                                              | N      | AAGG    | 16       | 3'              | 1/20 (5)              | 4/14 (29)    | VKORC1L1                                    | N                   | ATT     | 8        | 3'       | 0/23                               | (15)           |
| C19orf2(D19<br>S433)                               | N.A.   | AGGA    | 13       | intron          | 1/24 (4)              | 5/19 (26)    | NRP2                                        | Y                   | TAT     | 10       | 3'       | 0/22                               | 3/15<br>(20)   |
| CDH1                                               | Y      | AAAG    | 20       | intron          | 2/24 (8)              | 3/17 (18)    | VANGL2                                      | Y                   | ATT     | 10       | 3'       | 0/22                               | 1/6<br>(17)    |

SUPPLEMENTARY MATERIALS: TABLES

|     |   |      |    |        |          |           |       |   |     |   |    |      |     |
|-----|---|------|----|--------|----------|-----------|-------|---|-----|---|----|------|-----|
| MOG | N | AAAT | 11 | 3'     | 2/22 (9) | 3/7 (43)  | CRKL  | Y | AAC | 9 | 3' | 0/22 | 0/6 |
| FGA | N | AAAG | 14 | intron | 0/24     | 4/15 (27) | HOXB6 | Y | GAT | 9 | 3' | 0/19 | 0/0 |

<sup>a</sup>Y: The locus has been associated with cancer; N: no association has been reported;

N.A.:not applicable

<sup>b</sup> Mutation frequency was calculated by dividing the number of mutated cases by the number of informative cases.

**Supplementary Table 2. cont. 141 loci examined for FS/LOH in 24 E/L positive**

**LMs**

Genes with trinucleotide repeats (64 genes) cont.

| Gene    | Cancer <sup>a</sup> | Repeats | No. Unit | Posotion | Frame-shifts          |              | Gene   | Cancer | Repeats  | No. Unit | Posotion | Frame-shifts |              |
|---------|---------------------|---------|----------|----------|-----------------------|--------------|--------|--------|----------|----------|----------|--------------|--------------|
|         |                     |         |          |          | Freq.(%) <sup>b</sup> | LOH Freq.(%) |        |        |          |          |          | Freq.(%)     | LOH Freq.(%) |
| PAPSS2  | Y                   | CAG     | 8        | 5'       | 1/23 (4)              | 0/2          | HTT    | N      | GCC      | 10       | exon     | 0/22         | 0/6          |
| BLMH    | Y                   | CCG     | 9        | 5'       | 0/22                  | 2/8 (25)     | NCOA3  | Y      | GCA      | 20       | exon     | 0/23         | 3/9 (33)     |
| MTHFD1L | N                   | CCG     | 8        | 5'       | 0/24                  | 1/7 (14)     | BMP2K  | N      | CAG      | 27       | exon     | 0/22         | 0/0          |
| MAB21L1 | N                   | CAG     | 19       | 5'       | 0/23                  | 0/15         | MN1    | Y      | CAG      | 27       | exon     | 0/23         | 0/4          |
| GLS     | Y                   | CAG     | 15       | 5'       | 0/23                  | 2/17 (12)    | ZNF384 | Y      | CAG      | 16       | exon     | 0/21         | 0/5          |
| STRC    | N                   | CAG     | 11       | 5'       | 0/24                  | 0/1          | BAIAP1 | N      | CAG      | 20       | exon     | 0/24         | 2/10 (20)    |
| GRK5    | Y                   | CGG     | 9        | 5'       | 0/22                  | 0/0          | SCA1   | Y      | CAG      | 29       | exon     | 2/24 (8)     | 2/19 (11)    |
| GALNT5  | N                   | CAG     | 8        | 5'       | 0/22                  | 0/0          | NCOR2  | Y      | CAG      | 12       | exon     | 0/24         | 5/17 (29)    |
| BPGM    | N                   | CAG     | 8        | 5'       | 0/22                  | 0/0          | GATA6  | Y      | CCA      | 10       | exon     | 0/24         | 0/0          |
| TRHDE   | N                   | AGG     | 8        | 5'       | 0/21                  | 0/2          | PLCZ1  | Y      | GGA      | 15       | exon     | 0/24         | 3/8 (38)     |
| MAF2    | Y                   | CGG     | 8        | 5'       | 0/24                  | 6/17 (35)    | ZNF161 | N      | CAG, CAA | 12, 6    | exon     | 3/24 (13)    | 0/1          |
| PCTK3   | Y                   | AGG     | 8        | 5'       | 0/24                  | 4/14 (29)    |        |        |          |          |          |              |              |
| STC1    | Y                   | CAG     | 6        | 3'       | 0/24                  | 0/0          |        |        |          |          |          |              |              |
| YEATS2  | N                   | GGA     | 9        | exon     | 0/24                  | 2/12 (17)    |        |        |          |          |          |              |              |
| TNRC6B  | Y                   | CAG     | 8        | exon     | 1/24 (4)              | 0/8          |        |        |          |          |          |              |              |
| DACH1   | Y                   | CAG     | 24       | exon     | 1/12 (8)              | 0/1          |        |        |          |          |          |              |              |
| NKD2    | Y                   | CAC     | 9        | exon     | 1/23 (4)              | 0/2          |        |        |          |          |          |              |              |
| ASPN    | N                   | TGA     | 14       | exon     | 0/23                  | 1/15 (7)     |        |        |          |          |          |              |              |
| ATBF1   | Y                   | GGA     | 24       | exon     | 0/24                  | 4/18 (22)    |        |        |          |          |          |              |              |
| C19ORF2 | Y                   | TGA     | 9        | exon     | 0/23                  | 0/6          |        |        |          |          |          |              |              |
| CHAC    | Y                   | TGA     | 11       | exon     | 0/24                  | 0/1          |        |        |          |          |          |              |              |
| DIAPH1  | Y                   | GGA     | 11       | exon     | 0/24                  | 1/4 (25)     |        |        |          |          |          |              |              |

SUPPLEMENTARY MATERIALS: TABLES

|         |   |     |    |      |      |           |
|---------|---|-----|----|------|------|-----------|
| EPHB6   | Y | AGG | 8  | exon | 0/24 | 0/0       |
| CBX4    | N | GTG | 11 | exon | 0/24 | 0/2       |
| C14ORF4 | N | CAG | 21 | exon | 0/24 | 1/4 (25)  |
| HRC     | N | GAT | 13 | exon | 0/24 | 5/17 (29) |
| SNAPC4  | N | GCA | 9  | exon | 0/24 | 0/0       |

<sup>a</sup>Y: The locus has been associated with cancer; N: no association has been reported; N.A.:not applicable

<sup>b</sup>Mutation frequency was calculated by dividing the number of mutated cases by the number of informative cases.

SUPPLEMENTARY MATERIALS: TABLES

**Supplementary Table 3: Loci associated with E/L in LM from primary CRC**

| Genes                | Cancer <sup>a</sup> | Repeats    | No. Unit | Repeats<br>Positin | Gene Location | Frame-shift or LOH Freq.<br>in 24 MSI-L/EMAST LMs (%) <sup>b</sup> | Frame-shift or LOH Freq.<br>in Total LMs (%) <sup>c</sup> | Association with<br>E/L <sup>d</sup> |
|----------------------|---------------------|------------|----------|--------------------|---------------|--------------------------------------------------------------------|-----------------------------------------------------------|--------------------------------------|
| (MSI Loci)           |                     |            |          |                    |               |                                                                    |                                                           |                                      |
| <i>RBM47</i>         | N                   | AAAG       | 16       | 3'                 | 4p14          | 9/24 (38)                                                          | 18/76 (24)                                                | No                                   |
| <i>D21S11</i>        | N.A.                | TAGA       | 11       | intergenic         | 21q21.1       | 6/24 (25)                                                          | 12/77 (16)                                                | Yes (0.04)                           |
| <i>ANKRD5</i>        | N                   | ATGA, TAGA | 5,10     | 3'                 | 20p12.2       | 4/24 (17)                                                          | 13/77 (17)                                                | Yes (0.049)                          |
| <i>WIPF2</i>         | Y                   | CGG        | 9        | 5'                 | 17q21         | 3/24 (13)                                                          | 13/76 (17)                                                | No                                   |
| <i>ZNF161</i>        | N                   | CAG, CAA   | 12, 6    | exon               | 17q22         | 3/24 (13)                                                          | 4/76(5)                                                   | No                                   |
| (LOH Loci)           |                     |            |          |                    |               |                                                                    |                                                           |                                      |
| <i>BCL6B</i>         | Y                   | CAG        | 9        | exon               | 17p13.1       | 9/10 (90)                                                          | 24/29 (83)                                                | No                                   |
| <i>MNT</i>           | Y                   | CA         | 23       | 3'                 | 17p13.3       | 12/14 (86)                                                         | 40/52 (77)                                                | No                                   |
| <i>D9S303</i>        | N.A.                | GATA       | 12       | intron             | 9q21.32       | 13/16 (81)                                                         | 29/54 (54)                                                | No                                   |
| <i>BCL2 (D18S51)</i> | Y                   | AAAG       | 18       | intron             | 18q21.33      | 15/19 (79)                                                         | 46/58 (79)                                                | No                                   |
| <i>KDM6B</i>         | Y                   | CCA        | 12       | exon               | 17p13.1       | 5/7 (71)                                                           | 19/23 (83)                                                | No                                   |
| <i>D21S11</i>        | N.A.                | TAGA       | 11       | intergenic         | 21q21.1       | 10/15 (67)                                                         | 32/48 (67)                                                | No                                   |
| <i>SMARCA2</i>       | Y                   | CAG        | 20       | exon               | 9p24.3        | 8/13 (62)                                                          | 15/39 (38)                                                | Yes (0.017)                          |
| <i>SEMA6D</i>        | Y                   | CA         | 22       | 3'                 | 15q21.1       | 11/18 (61)                                                         | 35/57 (61)                                                | No                                   |
| <i>STYK1</i>         | Y                   | CA         | 11       | 3'                 | 12p13.2       | 9/15 (60)                                                          | 20/45 (44)                                                | No                                   |
| <i>D5S818</i>        | N.A.                | AGAT       | 11       | intergenic         | 5q23.2        | 11/19 (58)                                                         | 41/61 (67)                                                | No                                   |
| <i>D8S1179</i>       | N.A.                | TAGA       | 11       | intron             | 8q24.13       | 9/17 (53)                                                          | 26/55 (47)                                                | No                                   |

<sup>a</sup>Each gene locus was examined for its association with cancer by accessing NCBI PubMed data base.

Y: the locus has been associated with cancer; N: no association has been reported. N.A. not applicable.

<sup>b</sup>A mutation frequency was determined in 24 E/L positive LMs by ratio between the number of mutated cases divided by the number of informative cases.

<sup>c</sup>Frame-shift mutation or LOH frequency for each locus was determined in 78 LMs.

<sup>d</sup>P values were obtained by multivariate logistic regression analysis. P values for *D21S11* and *ANKRD5* were obtained by Firth's logistic regression method.

The associations were adjusted by age, sex, LM type (metachronous vs synchronous), primary tumor's grade and sites, and source of samples (DPOHTU vs DPCNU).

SUPPLEMENTARY MATERIALS: TABLES

**Supplementary Table 4: Characteristics of 88 Stage II/III primary CRC that experienced recurrence**

| primary CRC with recurrence | Stage         | KRAS Mutation | BRAF Mutations | 9p24         | E/L          | E/L/9p24     | Recurrence-free survival (months) | Survival after recurrence (months) | Overall survival (months) | Outcome   | No. of Metastasis | Simultaneous metastasis | Adjuvant chemotherapy |                 |                 |
|-----------------------------|---------------|---------------|----------------|--------------|--------------|--------------|-----------------------------------|------------------------------------|---------------------------|-----------|-------------------|-------------------------|-----------------------|-----------------|-----------------|
|                             | Stage II (2)  | positive (+)  | positive (+)   | positive (+) | positive (+) | positive (+) |                                   |                                    |                           | Dead (D)  |                   |                         |                       | Metachronous    | Hepatectomy     |
|                             | Stage III (3) | negative (-)  | negative (-)   | negative (-) | negative (-) | negative (-) |                                   |                                    |                           | alive (A) | LM (L) or other   | yes (Y), no (N)         | 0: <3, 1: >3          | yes (Y), no (N) | yes (Y), no (N) |
| 59T                         | 3             | -             | -              | +            | +            | +            | 13                                | 47                                 | 60                        | A         | L                 | Y                       | 0                     | N               | Y               |
| 61T                         | 3             | +             | -              | +            | +            | +            | 9                                 | 51                                 | 60                        | A         | L                 | Y                       | 0                     | Y               | Y               |
| 78T                         | 3             | -             | -              | +            | +            | +            | 33                                | 12                                 | 45                        | D         | L                 | Y                       | 0                     | N               | Y               |
| 80T                         | 3             | -             | -              | +            | +            | +            | 16                                | 44                                 | 60                        | A         | L                 | Y                       | 0                     | N               | Y               |
| 122T                        | 3             | -             | -              | +            | +            | +            | 8                                 | 35                                 | 43                        | D         | L                 | Y                       | 0                     | N               | Y               |
| 110T                        | 3             | -             | -              | +            | +            | +            | 3                                 | 57                                 | 60                        | A         | L                 | Y                       | 0                     | N               | Y               |
| 77T                         | 2             | -             | -              | +            | +            | +            | 11                                | 49                                 | 60                        | A         | L                 | Y                       | 0                     | N               | Y               |
| 63T                         | 2             | +             | -              | +            | +            | +            | 13                                | 47                                 | 60                        | A         | L                 | Y                       | 0                     | N               | Y               |
| 65T                         | 3             | +             | -              | +            | +            | +            | 31                                | 2                                  | 33                        | A         | L                 | N                       | 1                     | N               | Y               |
| 123T                        | 3             | -             | -              | +            | +            | +            | 40                                | 20                                 | 60                        | A         | L                 | N                       | 1                     | Y               | Y               |
| 155T                        | 3             | -             | -              | +            | +            | +            | 11                                | 9                                  | 20                        | D         | lung              | N.A                     | 1                     | N               | Y               |
| 2T                          | 3             | +             | -              | +            | +            | +            | 42                                | 17                                 | 59                        | D         | lung              | N.A                     | 1                     | Y               | Y               |
| 168T                        | 2             | -             | -              | +            | +            | +            | 14                                | 31                                 | 45                        | D         | lung              | N.A                     | 1                     | N               | Y               |
| 27T                         | 3             | +             | -              | +            | +            | +            | 33                                | 27                                 | 60                        | A         | lung              | N.A                     | 1                     | N               | Y               |
| 4026                        | 3             | -             | -              | +            | +            | +            | 5                                 | 38                                 | 43                        | D         | lung              | N.A                     | 1                     | N               | N               |
| 776                         | 3             | -             | -              | +            | +            | +            | 9                                 | 1                                  | 10                        | A         | lung              | N.A                     | 0                     | N               | Y               |
| 2303                        | 3             | -             | -              | +            | +            | +            | 21                                | 39                                 | 60                        | A         | lung              | N.A                     | 0                     | N               | Y               |
| 3634                        | 3             | -             | -              | +            | +            | +            | 12                                | 48                                 | 60                        | A         | lung              | N.A                     | 0                     | N               | N               |
| 944                         | 3             | -             | -              | +            | +            | +            | 5                                 | 19                                 | 24                        | A         | lung              | N.A                     | 0                     | N               | Y               |
| 1105                        | 3             | +             | -              | +            | +            | +            | 6                                 | 5                                  | 11                        | A         | lung              | N.A                     | 0                     | Y               | N               |
| 1024                        | 3             | +             | -              | +            | +            | +            | 11                                | 3                                  | 14                        | A         | ovary             | N.A                     | 0                     | N               | N               |
| 3873                        | 2             | -             | -              | +            | +            | +            | 44                                | 16                                 | 60                        | A         | peritoneal        | N.A                     | 0                     | N               | Y               |
| 1101                        | 3             | -             | -              | +            | +            | +            | 7                                 | 28                                 | 35                        | D         | peritoneal        | N.A                     | 0                     | Y               | Y               |
| 108T                        | 3             | -             | -              | +            | +            | +            | 10                                | 50                                 | 60                        | A         | pelvic            | N.A                     | 0                     | N               | Y               |
| 56                          | 2             | -             | -              | +            | +            | +            | 11                                | 37                                 | 48                        | D         | pelvic            | N.A                     | 0                     | N               | N               |
| 810                         | 2             | +             | +              | +            | +            | +            | 13                                | 13                                 | 26                        | D         | para-aortic nodes | N.A                     | 1                     | Y               | N               |
| 2781                        | 2             | +             | -              | +            | +            | +            | 13                                | 47                                 | 60                        | A         | anastomotic site  | N.A                     | 0                     | N               | N               |
| 948                         | 3             | -             | -              | +            | +            | +            | 5                                 | 18                                 | 23                        | A         | anastomotic site  | N.A                     | 0                     | Y               | Y               |
| 69T                         | 3             | -             | -              | +            | +            | +            | 18                                | 42                                 | 60                        | A         | T8 vertebra       | N.A                     | 0                     | N               | Y               |
| 104T                        | 2             | -             | -              | +            | +            | +            | 10                                | 50                                 | 60                        | A         | rectum            | N.A                     | 0                     | N               | Y               |
| 13T                         | 2             | -             | -              | +            | +            | +            | 16                                | 44                                 | 60                        | A         | colon             | N.A                     | 0                     | N               | Y               |
| 19T                         | 3             | -             | -              | -            | +            | -            | 14                                | 1                                  | 15                        | D         | L                 | N                       | 1                     | Y               | N               |
| 23T                         | 3             | +             | -              | -            | +            | -            | 12                                | 21                                 | 33                        | D         | L                 | N                       | 1                     | N               | Y               |
| 82T                         | 3             | +             | -              | -            | +            | -            | 6                                 | 10                                 | 16                        | D         | L                 | N                       | 1                     | N               | Y               |
| 119T                        | 3             | -             | -              | -            | +            | -            | 7                                 | 6                                  | 13                        | D         | L                 | N                       | 1                     | N               | Y               |
| 132T                        | 3             | -             | -              | -            | +            | -            | 18                                | 23                                 | 41                        | D         | L                 | N                       | 1                     | Y               | Y               |
| 20T                         | 2             | -             | -              | -            | +            | -            | 51                                | 9                                  | 60                        | A         | L                 | N                       | 1                     | Y               | Y               |

SUPPLEMENTARY MATERIALS: TABLES

|      |   |   |   |   |   |   |    |    |    |   |   |   |   |   |   |
|------|---|---|---|---|---|---|----|----|----|---|---|---|---|---|---|
| 25T  | 2 | - | - | - | + | - | 10 | 17 | 27 | D | L | N | 1 | Y | Y |
| 81T  | 3 | - | - | - | + | - | 18 | 36 | 54 | D | L | N | 0 | Y | Y |
| 113T | 3 | + | - | - | + | - | 12 | 6  | 18 | D | L | N | 0 | Y | Y |
| 115T | 3 | + | - | - | + | - | 8  | 9  | 17 | D | L | N | 0 | Y | Y |
| 56T  | 3 | - | - | - | + | - | 12 | 11 | 23 | D | L | N | 0 | N | N |
| 58T  | 3 | - | - | - | + | - | 4  | 37 | 41 | A | L | N | 0 | N | N |
| 84T  | 2 | - | - | - | + | - | 8  | 46 | 54 | D | L | Y | 0 | N | Y |
| 76T  | 3 | - | - | - | + | - | 47 | 13 | 60 | D | L | N | 0 | Y | Y |
| 121T | 2 | - | - | - | + | - | 15 | 45 | 60 | A | L | Y | 1 | N | Y |

Supplementary Table 4  
cont.

| Stage II/III<br>primary CRC with<br>recurrence | Stage         | KRAS Mutation | BRAF Mutations | 9p24.2 LOH   | E/L          | E/L/9p24     | Recurrence-free survival (months) | Survival after recurrence (months) | Overall survival (months) | Outcome   |                 |                 | No. of Metastasis | Simultaneous metastasis | Adjuvant chemotherapy |
|------------------------------------------------|---------------|---------------|----------------|--------------|--------------|--------------|-----------------------------------|------------------------------------|---------------------------|-----------|-----------------|-----------------|-------------------|-------------------------|-----------------------|
|                                                | Stage II (2)  | positive (+)  | positive (+)   | positive (+) | positive (+) | positive (+) |                                   |                                    |                           | Dead (D)  | Metachronous    | Hepatectomy     |                   |                         |                       |
|                                                | Stage III (3) | negative (-)  | negative (-)   | negative (-) | negative (-) | negative (-) |                                   |                                    |                           | alive (A) | LM (L) or other | yes (Y), no (N) |                   |                         |                       |
| 118T                                           | 3             | -             | -              | -            | +            | -            | 1                                 | 22                                 | 23                        | D         | L               | N               | 1                 | N                       | Y                     |
| 109T                                           | 3             | -             | -              | -            | +            | -            | 42                                | 14                                 | 56                        | A         | L               | N               | 0                 | N                       | N                     |
| 503                                            | 3             | -             | -              | -            | +            | -            | 20                                | 1                                  | 21                        | D         | L               | N               | 1                 | N                       | Y                     |
| 83T                                            | 3             | +             | -              | -            | -            | -            | 2                                 | 20                                 | 22                        | D         | L               | N               | 0                 | Y                       | Y                     |
| 85T                                            | 3             | -             | -              | -            | -            | -            | 11                                | 22                                 | 33                        | D         | L               | N               | 0                 | Y                       | Y                     |
| 86T                                            | 3             | -             | -              | -            | -            | -            | 7                                 | 20                                 | 27                        | D         | L               | N               | 1                 | N                       | Y                     |
| 87T                                            | 3             | +             | -              | -            | -            | -            | 15                                | 14                                 | 29                        | D         | L               | N               | 0                 | N                       | Y                     |
| 112T                                           | 3             | +             | -              | -            | -            | -            | 37                                | 23                                 | 60                        | A         | L               | N               | 0                 | N                       | Y                     |
| 116T                                           | 3             | -             | -              | +            | -            | -            | 10                                | 17                                 | 27                        | D         | L               | N               | 1                 | Y                       | Y                     |
| 117T                                           | 3             | +             | -              | +            | -            | -            | 15                                | 36                                 | 51                        | D         | L               | N               | 0                 | N                       | Y                     |
| 21T                                            | 3             | +             | -              | +            | -            | -            | 6                                 | 3                                  | 9                         | D         | L               | N               | 0                 | Y                       | Y                     |
| 29T                                            | 3             | +             | -              | +            | -            | -            | 16                                | 15                                 | 31                        | D         | L               | Y               | 0                 | Y                       | Y                     |
| 67T                                            | 3             | -             | -              | +            | -            | -            | 28                                | 9                                  | 37                        | A         | L               | N               | 0                 | Y                       | Y                     |
| 60T                                            | 3             | +             | -              | +            | -            | -            | 11                                | 39                                 | 50                        | D         | L               | N               | 0                 | N                       | Y                     |
| 111T                                           | 3             | -             | -              | +            | -            | -            | 7                                 | 28                                 | 35                        | D         | L               | Y               | 0                 | N                       | Y                     |
| 525                                            | 3             | +             | -              | +            | -            | -            | 21                                | 20                                 | 41                        | A         | L               | N               | 0                 | N                       | Y                     |
| 1045                                           | 3             | +             | -              | +            | -            | -            | 8                                 | 4                                  | 12                        | A         | L               | N               | 1                 | N                       | N                     |
| 16T                                            | 3             | -             | +              | -            | -            | -            | 8                                 | 1                                  | 9                         | D         | L               | N               | 1                 | Y                       | Y                     |
| 126T                                           | 3             | -             | -              | -            | -            | -            | 12                                | 11                                 | 28                        | D         | L               | N               | 1                 | Y                       | Y                     |
| 144T                                           | 3             | -             | -              | -            | -            | -            | 36                                | 6                                  | 42                        | D         | L               | N               | 1                 | Y                       | Y                     |
| 22T                                            | 2             | -             | -              | -            | -            | -            | 43                                | 14                                 | 57                        | D         | L               | N               | 1                 | Y                       | Y                     |
| 114T                                           | 2             | -             | -              | -            | -            | -            | 40                                | 9                                  | 49                        | D         | L               | N               | 0                 | Y                       | Y                     |
| 44T                                            | 2             | -             | -              | -            | -            | -            | 25                                | 33                                 | 58                        | A         | L               | Y               | 0                 | N                       | Y                     |
| 935                                            | 3             | -             | -              | -            | -            | -            | 8                                 | 12                                 | 20                        | D         | L               | N               | 1                 | N                       | Y                     |
| 1018                                           | 3             | -             | -              | -            | -            | -            | 7                                 | 28                                 | 35                        | D         | L               | N               | 0                 | N                       | Y                     |
| 31T                                            | 3             | -             | -              | -            | +            | -            | 16                                | 37                                 | 53                        | A         | lung            | N.A             | 0                 | N                       | Y                     |
| 603                                            | 3             | -             | -              | -            | +            | -            | 3                                 | 28                                 | 31                        | D         | lung            | N.A             | 0                 | N                       | Y                     |
| 47T                                            | 3             | +             | -              | -            | -            | -            | 15                                | 36                                 | 51                        | D         | lung            | N.A             | 1                 | N                       | Y                     |
| 5195                                           | 2             | +             | -              | -            | -            | -            | 23                                | 37                                 | 60                        | A         | lung            | N.A             | 0                 | N                       | Y                     |
| 610                                            | 3             | -             | -              | -            | -            | -            | 11                                | 33                                 | 44                        | D         | lung            | N.A             | 0                 | N                       | N                     |



SUPPLEMENTARY MATERIALS: TABLES

|         |   |   |   |   |   |   |    |    |    |   |                   |     |   |   |   |
|---------|---|---|---|---|---|---|----|----|----|---|-------------------|-----|---|---|---|
| 717     | 3 | - | - | - | - | - | 14 | 11 | 25 | D | lung              | N.A | 0 | N | Y |
| 947     | 3 | + | - | - | - | - | 7  | 30 | 37 | D | lung              | N.A | 0 | N | Y |
| 1066    | 2 | - | - | + | - | - | 14 | 38 | 52 | D | lung              | N.A | 0 | N | Y |
| 1002    | 3 | - | - | + | - | - | 18 | 5  | 23 | A | lung              | N.A | 0 | N | Y |
| 518     | 2 | - | - | + | - | - | 21 | 23 | 44 | A | lung              | N.A | 0 | N | Y |
| 1039    | 2 | + | - | - | + | - | 10 | 3  | 13 | A | peritoneal        | N.A | 0 | N | Y |
| 801     | 3 | + | - | - | + | - | 21 | 17 | 38 | A | ovary             | N.A | 0 | Y | Y |
| 51T     | 2 | + | - | - | - | - | 41 | 15 | 56 | A | prostatic         | N.A | 0 | N | Y |
| 41T     | 3 | + | - | - | - | - | 18 | 2  | 20 | D | pelvic and other  | N.A | 1 | Y | Y |
| 1023    | 3 | - | - | - | - | - | 12 | 28 | 40 | D | para-aortic nodes | N.A | 0 | N | Y |
| 617     | 3 | - | - | - | + | - | 24 | 10 | 34 | A | rectum            | N.A | 1 | Y | Y |
| 2295    | 3 | - | - | - | - | - | 1  | 21 | 22 | D | rectum            | N.A | 0 | N | Y |
| Average |   |   |   |   |   |   | 16 | 23 | 39 |   |                   |     |   |   |   |

SUPPLEMENTARY MATERIALS: TABLES

Supplementary  
Table 5

Clinico-pathological characteristics and genetic  
alterations of 50 primary CRC that gave rise to LMs

| Variables <sup>a)</sup>         | Number of Cases                        | Association with <sup>b)</sup> |                          |                              |                      |                    |
|---------------------------------|----------------------------------------|--------------------------------|--------------------------|------------------------------|----------------------|--------------------|
|                                 |                                        | E/L (O.R.)                     | 9p24 <sup>-</sup> (O.R.) | E/L/9p24 <sup>-</sup> (O.R.) | KRAS/BRAF (O.R.)     |                    |
| Age                             | ≤62 vs >62                             | 29 vs 21                       | 0.66                     | 0.25                         | 0.13                 | 0.93               |
| Sex                             | Female vs Male                         | 19 vs 31                       | 0.7                      | 0.89                         | 0.56                 | 0.12               |
| Stage                           | II vs III                              | 9 vs 41                        | 0.48                     | 0.29                         | 0.85                 | 0.14               |
| Tumor Grade                     | G1 vs G2&G3                            | 13 vs 37                       | 0.86                     | 0.21                         | 0.63                 | <b>0.04 (9.14)</b> |
| Tumor Sites                     | Proximal vs Distal                     | 8 vs 42                        | 0.07                     | 0.45                         | 0.57                 | 0.82               |
| Tumor Type                      | Colon vs Rectum                        | 21 vs 29                       | 0.11                     | 0.56                         | 0.39                 | 0.6                |
| Hepatectomy                     | No vs Yes                              | 35 vs 15                       | 0.32                     | <b>0.002 (9.28)</b>          | <b>0.001 (18.85)</b> | 0.48               |
| Sample Source                   | Mie (DPMU) vs Korea (DPCNU)            | 5 vs 45                        | 0.12                     | 0.9                          | 1                    | 0.77               |
| Adjuvant Chemotherapy           | No vs Yes                              | 5 vs 45                        | 0.28                     | 0.4                          | 1                    | 0.5                |
| MSI Status                      | E/L vs MS                              | 22 vs 28                       | N.A.                     | 0.7                          | N.A.                 | 0.13               |
| 9p24.2 LOH status               | 9p24 <sup>-</sup> vs 9p24 <sup>+</sup> | 19 vs 31                       | 0.7                      | N.A.                         | N.A.                 | 0.12               |
| E/L/9p24.2 <sup>-</sup>         | No vs Yes                              | 40 vs 10                       | N.A.                     | N.A.                         | N.A.                 | 0.77               |
| KRAS/BRAF Mutations             | No vs Yes                              | 33 vs 17                       | 0.13                     | 0.12                         | 0.77                 | N.A.               |
| RFS                             | ≤17 vs >17                             | 36 vs 14                       | 0.59                     | 0.84                         | 0.87                 | 0.25               |
| SFR                             | ≤19 vs >19                             | 30 vs 20                       | 0.3                      | <b>0.01 (4.93)</b>           | <b>0.01 (9.33)</b>   | 0.63               |
| OS                              | ≤36 vs >36                             | 25 vs 25                       | 0.09                     | 0.15                         | <b>0.02 (13.5)</b>   | 0.14               |
| Simultaneous Metastasis         | No vs Yes                              | 30 vs 20                       | 0.2                      | 0.12                         | 0.057                | 0.63               |
| Number of Metastasis            | ≤3 vs >3                               | 33 vs 17                       | 0.77                     | 0.14                         | 0.31                 | 0.62               |
| Liver Lobe affected             | One vs Two                             | 30 vs 20                       | <b>0.03 (3.92)</b>       | 0.34                         | 0.47                 | 0.63               |
| Aggressiveness                  | No vs Yes                              | 23 vs 27                       | 0.52                     | 0.06                         | <b>0.03 (0.15)</b>   | 0.62               |
| LM recurrence after hepatectomy | No vs Yes                              | 42 vs 8                        | 0.69                     | 0.45                         | 0.19                 | 0.99               |

<sup>a)</sup>The average years of age in this cohort was 62, which was used as a cut-off criteria for dividing a cohort into 2 groups according to the age. The average months of RFS, SFR and OS was 17, 19 and 36 months respectively and was used as a cut-off criteria for dividing a cohort into 2 groups.

<sup>b)</sup>To determine the association between 2 variables, an univariate logistic regression analysis was used. The each number represents a p value.

When p value is less than 0.05, the association is considered to be a significant (underlined bolted numbers). N.A.: Not applicable. O.R.: Odds Ratio.

SUPPLEMENTARY MATERIALS: TABLES

**Supplementary Table 6: 67 Stage II/III primary CRC without recurrence from DPCNU**

| Stage II/III Primary CRC | Stage                         | KRAS Mutation                | BRAF Mutations               | 9p24.2                       | E/L                          | E/L/9p24.2                   | Recurrence                   | free survival (months)       | Dead/alive                   |
|--------------------------|-------------------------------|------------------------------|------------------------------|------------------------------|------------------------------|------------------------------|------------------------------|------------------------------|------------------------------|
| without recurrence       | Stage II (2)<br>Stage III (3) | positive (+)<br>negative (-) |
| 161T                     | 3                             | +                            | -                            | +                            | +                            | +                            | 60                           | A                            |                              |
| 106T                     | 3                             | -                            | -                            | +                            | +                            | +                            | 60                           | A                            |                              |
| 34T                      | 3                             | +                            | -                            | +                            | +                            | +                            | 60                           | A                            |                              |
| 98T                      | 3                             | +                            | -                            | +                            | +                            | +                            | 60                           | A                            |                              |
| 3T                       | 3                             | -                            | -                            | +                            | +                            | +                            | 60                           | A                            |                              |
| 10T                      | 3                             | +                            | -                            | +                            | +                            | +                            | 60                           | A                            |                              |
| 75T                      | 2                             | -                            | -                            | +                            | +                            | +                            | 60                           | A                            |                              |
| 165T                     | 2                             | -                            | -                            | +                            | +                            | +                            | 0                            | A                            |                              |
| 143T                     | 2                             | +                            | -                            | +                            | +                            | +                            | 23                           | A                            |                              |
| 40T                      | 2                             | -                            | -                            | +                            | +                            | +                            | 60                           | A                            |                              |
| 49T                      | 2                             | -                            | -                            | +                            | +                            | +                            | 17                           | A                            |                              |
| 125T                     | 2                             | -                            | -                            | +                            | +                            | +                            | 35                           | A                            |                              |
| 151T                     | 2                             | -                            | -                            | +                            | +                            | +                            | 60                           | A                            |                              |
| 152T                     | 2                             | -                            | -                            | +                            | +                            | +                            | 58                           | A                            |                              |
| 50T                      | 3                             | -                            | -                            | +                            | -                            | -                            | 38                           | A                            |                              |
| 131T                     | 3                             | +                            | -                            | +                            | -                            | -                            | 60                           | A                            |                              |
| 105T                     | 3                             | +                            | -                            | +                            | -                            | -                            | 60                           | A                            |                              |
| 164T                     | 2                             | -                            | -                            | +                            | -                            | -                            | 60                           | A                            |                              |
| 134T                     | 2                             | +                            | -                            | +                            | -                            | -                            | 59                           | A                            |                              |
| 127T                     | 2                             | +                            | -                            | +                            | -                            | -                            | 57                           | A                            |                              |
| 129T                     | 2                             | -                            | -                            | +                            | -                            | -                            | 59                           | A                            |                              |
| 11T                      | 2                             | -                            | -                            | +                            | -                            | -                            | 60                           | A                            |                              |
| 145T                     | 2                             | +                            | -                            | +                            | -                            | -                            | 39                           | A                            |                              |
| 24T                      | 2                             | -                            | -                            | -                            | +                            | -                            | 60                           | A                            |                              |
| 71T                      | 2                             | -                            | -                            | -                            | +                            | -                            | 54                           | A                            |                              |
| 139T                     | 2                             | +                            | -                            | -                            | +                            | -                            | 44                           | A                            |                              |
| 142T                     | 2                             | -                            | -                            | -                            | +                            | -                            | 60                           | A                            |                              |
| 88T                      | 2                             | +                            | -                            | -                            | +                            | -                            | 60                           | A                            |                              |
| 158T                     | 2                             | +                            | -                            | -                            | +                            | -                            | 37                           | A                            |                              |
| 162T                     | 3                             | -                            | -                            | -                            | +                            | -                            | 1                            | A                            |                              |
| 166T                     | 3                             | -                            | -                            | -                            | +                            | -                            | 23                           | A                            |                              |
| 171T                     | 3                             | -                            | -                            | -                            | +                            | -                            | 60                           | A                            |                              |
| 154T                     | 3                             | -                            | -                            | -                            | +                            | -                            | 55                           | A                            |                              |
| 72T                      | 3                             | +                            | -                            | -                            | +                            | -                            | 9                            | A                            |                              |

| Stage II/III Primary CRC | Stage                         | KRAS Mutation                | BRAF Mutations               | 9p24.2                       | E/L                          | E/L/9p24.2                   | Recurrence                   | free survival (months)       | Dead/alive                   |
|--------------------------|-------------------------------|------------------------------|------------------------------|------------------------------|------------------------------|------------------------------|------------------------------|------------------------------|------------------------------|
| without recurrence       | Stage II (2)<br>Stage III (3) | positive (+)<br>negative (-) |
| 90T                      | 2                             | +                            | -                            | -                            | -                            | -                            | 60                           | A                            |                              |
| 99T                      | 2                             | +                            | -                            | -                            | -                            | -                            | 0                            | A                            |                              |
| 7T                       | 2                             | -                            | -                            | -                            | -                            | -                            | 60                           | A                            |                              |
| 42T                      | 2                             | -                            | -                            | -                            | -                            | -                            | 59                           | A                            |                              |
| 45T                      | 2                             | -                            | -                            | -                            | -                            | -                            | 48                           | A                            |                              |
| 130T                     | 2                             | +                            | -                            | -                            | -                            | -                            | 47                           | A                            |                              |
| 148T                     | 2                             | -                            | -                            | -                            | -                            | -                            | 60                           | A                            |                              |
| 64T                      | 2                             | +                            | -                            | -                            | -                            | -                            | 60                           | A                            |                              |
| 68T                      | 2                             | -                            | -                            | -                            | -                            | -                            | 3                            | A                            |                              |
| 70T                      | 2                             | +                            | -                            | -                            | -                            | -                            | 13                           | A                            |                              |
| 100T                     | 2                             | +                            | -                            | -                            | -                            | -                            | 60                           | A                            |                              |
| 107T                     | 2                             | -                            | -                            | -                            | -                            | -                            | 48                           | A                            |                              |
| 136T                     | 2                             | +                            | -                            | -                            | -                            | -                            | 11                           | A                            |                              |
| 141T                     | 2                             | -                            | -                            | -                            | -                            | -                            | 60                           | A                            |                              |
| 160T                     | 2                             | +                            | -                            | -                            | -                            | -                            | 60                           | A                            |                              |
| 33T                      | 3                             | -                            | -                            | -                            | -                            | -                            | 60                           | A                            |                              |
| 170T                     | 3                             | +                            | -                            | -                            | -                            | -                            | 0                            | A                            |                              |
| 66T                      | 3                             | -                            | -                            | -                            | -                            | -                            | 29                           | A                            |                              |
| 35T                      | 3                             | +                            | -                            | -                            | -                            | -                            | 58                           | A                            |                              |
| 36T                      | 3                             | -                            | -                            | -                            | -                            | -                            | 0                            | A                            |                              |
| 52T                      | 3                             | -                            | -                            | -                            | -                            | -                            | 60                           | A                            |                              |
| 128T                     | 3                             | -                            | -                            | -                            | -                            | -                            | 58                           | A                            |                              |
| 156T                     | 3                             | -                            | -                            | -                            | -                            | -                            | 60                           | A                            |                              |
| 157T                     | 3                             | -                            | -                            | -                            | -                            | -                            | 58                           | A                            |                              |
| 30T                      | 3                             | +                            | -                            | -                            | -                            | -                            | 60                           | A                            |                              |
| 89T                      | 3                             | -                            | -                            | -                            | -                            | -                            | 50                           | A                            |                              |
| 8T                       | 3                             | -                            | -                            | -                            | -                            | -                            | 59                           | A                            |                              |
| 147T                     | 3                             | -                            | -                            | -                            | -                            | -                            | 60                           | A                            |                              |
| 48T                      | 2                             | -                            | -                            | -                            | -                            | -                            | 60                           | A                            |                              |

SUPPLEMENTARY MATERIALS: TABLES

|      |   |   |   |   |   |   |    |   |
|------|---|---|---|---|---|---|----|---|
| 101T | 3 | - | - | - | + | - | 2  | A |
| 95T  | 3 | + | - | - | + | - | 54 | A |
| 53T  | 3 | + | - | - | + | - | 60 | A |
| 79T  | 2 | - | - | - | + | - | 60 | A |

SUPPLEMENTARY MATERIALS: TABLES

**Supplementary Table 7**

**A: 61 cases of LMs**

|                               | No. of Cases with     |                           |       | P value |
|-------------------------------|-----------------------|---------------------------|-------|---------|
|                               | E/L/9p24 <sup>-</sup> | non-E/L/9p24 <sup>-</sup> | Total |         |
| mutated: <i>KRAS/BRAF</i> (%) | 10/1 (32%)            | 9/1*                      | 20    | 0.93    |
| no mutation in both           | 23                    | 18                        | 41    |         |
| Total                         | 34                    | 27                        | 61    |         |

\*One case had both *KRAS* and *BRAF* mutations

**B: 61 cases of matched primary CRC**

|                               | No. of Cases with     |                           |       | P value |
|-------------------------------|-----------------------|---------------------------|-------|---------|
|                               | E/L/9p24 <sup>-</sup> | non-E/L/9p24 <sup>-</sup> | Total |         |
| mutated: <i>KRAS/BRAF</i> (%) | 9/1 (37%)             | 8/1                       | 18    | 0.33    |
| no mutation in both           | 17                    | 26                        | 43    |         |
| Total                         | 27                    | 34                        | 61    |         |

**C: 67 cases of Stage III primary CRC with recurrence**

|                               | No. of Cases with     |                           |       | P value |
|-------------------------------|-----------------------|---------------------------|-------|---------|
|                               | E/L/9p24 <sup>-</sup> | non-E/L/9p24 <sup>-</sup> | Total |         |
| mutated: <i>KRAS/BRAF</i> (%) | 6/0 (18%)             | 17/1                      | 24    | 0.31    |
| no mutation in both           | 16                    | 27                        | 43    |         |
| Total                         | 34                    | 27                        | 67    |         |

**D: 74 cases of Stage III primary CRC with and without recurrence**

|                               | No. of Cases with     |                           |       | P value |
|-------------------------------|-----------------------|---------------------------|-------|---------|
|                               | E/L/9p24 <sup>-</sup> | non-E/L/9p24 <sup>-</sup> | Total |         |
| mutated: <i>KRAS/BRAF</i> (%) | 8/0 (42%)             | 21/1                      | 30    | 0.87    |
| no mutation in both           | 11                    | 33                        | 44    |         |
| Total                         | 19                    | 55                        | 74    |         |
